# Supplementary material for: The influence of chirality on the behavior of oligonucleotides inside cells: revealing the potent cytotoxicity of G-rich l-RNA
Source: Chem Sci. 2022 Dec 30;14(5):1145–54. doi: 10.1039/d2sc05511b (PMC9891384; doi:10.1039/d2sc05511b)
Supplement: SC-014-D2SC05511B-s001 [file SC-014-D2SC05511B-s001.xlsx]

## Sheet: L-r(GGAA)8
L-r(GGAA)8_Upregulated					L-r(GGAA)8_Downregulated
ENSEMBL ID	gene_name	log2FoldChange	padj		ENSEMBL ID	gene_name	log2FoldChange	padj
ENSG00000171931	FBXW10	7.11618	3.54775e-06		ENSG00000079931	MOXD1	-5.51499	0.00112616
ENSG00000110427	KIAA1549L	7.06604	3.59261e-05		ENSG00000205669	ACOT6	-5.34611	0.0161498
ENSG00000163739	CXCL1	7.03126	6.78037e-06		ENSG00000100290	BIK	-5.31636	0.022037
ENSG00000260633		6.93999	9.05887e-05		ENSG00000260091		-5.28475	0.00705852
ENSG00000275894		6.69973	0.000167952		ENSG00000134042	MRO	-5.24343	0.016474
ENSG00000186517	ARHGAP30	6.30274	0.00402782		ENSG00000272468		-5.1573	0.00506194
ENSG00000234219	CDCA4P4	6.27265	9.31588e-05		ENSG00000188906	LRRK2	-5.15228	0.0329764
ENSG00000109063	MYH3	6.25422	0.000249978		ENSG00000178401	DNAJC22	-5.08903	0.0154182
ENSG00000158865	SLC5A11	6.18196	0.00206982		ENSG00000138449	SLC40A1	-5.04019	0.0407912
ENSG00000198342	ZNF442	6.10207	0.000518302		ENSG00000165821	SALL2	-4.85385	0.0147385
ENSG00000279584		6.0739	0.00258908		ENSG00000262772	LINC01977	-4.82327	0.019409
ENSG00000130701	RBBP8NL	6.06708	0.00124687		ENSG00000280836		-4.7399	0.0199762
ENSG00000255202		6.03968	0.00438194		ENSG00000235621	LINC00494	-4.69538	0.0259561
ENSG00000243225		6.02488	0.00171797		ENSG00000277511		-4.67529	0.0455697
ENSG00000270722	RNVU1-31	5.92099	0.00296819		ENSG00000237807		-4.59366	0.0199912
ENSG00000106624	AEBP1	5.67539	0.0169585		ENSG00000225216		-4.57843	0.0162939
ENSG00000283662		5.51564	0.012625		ENSG00000233297	RASA4DP	-4.50428	0.0481945
ENSG00000207005	RNU1-2	5.42288	0.0096438		ENSG00000278817		-4.36987	0.0204321
ENSG00000286669		5.38253	0.00811667		ENSG00000221866	PLXNA4	-4.30181	0.0206155
ENSG00000087085	ACHE	5.26887	0.00154169		ENSG00000185972	CCIN	-4.17444	0.0499817
ENSG00000276517		5.12874	0.0182859		ENSG00000196220	SRGAP3	-3.97122	0.0440499
ENSG00000213386		5.11316	0.0213068		ENSG00000164764	SBSPON	-3.96931	0.0382505
ENSG00000260278	BMP2K-DT	5.0451	0.000720401		ENSG00000099251	HSD17B7P2	-3.94903	0.0338187
ENSG00000068976	PYGM	4.96698	0.0117632		ENSG00000236358		-3.64744	0.00153327
ENSG00000197748	CFAP43	4.8986	0.01547		ENSG00000228626		-3.59754	0.0174067
ENSG00000232716		4.88788	0.0388803		ENSG00000126882	FAM78A	-3.28227	0.00987021
ENSG00000173486	FKBP2	4.88548	0.0278925		ENSG00000187140	FOXD3	-3.25044	0.00918056
ENSG00000232536		4.81112	0.00833423		ENSG00000236107	SCN1A-AS1	-3.24452	0.0328527
ENSG00000169403	PTAFR	4.74654	0.0454712		ENSG00000253731	PCDHGA6	-3.09469	0.0296648
ENSG00000126562	WNK4	4.73233	0.0116109		ENSG00000188322	SBK1	-2.98721	0.0488193
ENSG00000139200	PIANP	4.7152	0.0294805		ENSG00000245864	MEF2C-AS2	-2.97826	0.0168634
ENSG00000230064		4.52787	0.0319323		ENSG00000275964		-2.9698	0.0356532
ENSG00000122877	EGR2	4.51055	2.48463e-05		ENSG00000231764	DLX6-AS1	-2.87447	3.91115e-07
ENSG00000269486	ERVK9-11	4.39095	0.0202465		ENSG00000204882	GPR20	-2.83755	0.045915
ENSG00000168918	INPP5D	4.33712	0.000916227		ENSG00000188747	NOXA1	-2.66825	0.00197474
ENSG00000246130		4.30434	0.0429212		ENSG00000188596	CFAP54	-2.62175	0.022506
ENSG00000273218		4.29351	0.0282685		ENSG00000138639	ARHGAP24	-2.56671	0.0388286
ENSG00000142513	ACP4	4.2736	0.00230499		ENSG00000166192	SENP8	-2.56518	0.00296468
ENSG00000125740	FOSB	4.24834	4.40073e-46		ENSG00000221819	GAS8-AS1	-2.42714	0.0235999
ENSG00000179388	EGR3	4.23158	0.0103957		ENSG00000286219	NOTCH2NLC	-2.41861	0.0298883
ENSG00000181392	SYNE4	4.21408	0.00154345		ENSG00000268964	ERVV-2	-2.3791	0.0298238
ENSG00000120738	EGR1	4.19831	6.93551e-153		ENSG00000133640	LRRIQ1	-2.3488	0.0070981
ENSG00000171786	NHLH1	4.19223	0.0177482		ENSG00000170382	LRRN2	-2.33082	0.0299256
ENSG00000272103		4.16999	0.0157735		ENSG00000259409	BMF-AS1	-2.27759	3.04879e-06
ENSG00000211454	AKR7L	4.09801	0.0389753		ENSG00000144285	SCN1A	-2.23447	0.0472702
ENSG00000258469	CHMP4BP1	4.04922	0.0395526		ENSG00000120328	PCDHB12	-2.23029	0.0159977
ENSG00000275405	U1	4.04502	0.00443467		ENSG00000168970	JMJD7-PLA2G4B	-2.20908	0.00286905
ENSG00000226380		3.93538	5.06442e-06		ENSG00000184194	GPR173	-2.20238	2.2747e-05
ENSG00000130513	GDF15	3.91528	1.63363e-73		ENSG00000184838	PRR16	-2.19377	0.0305281
ENSG00000148483	TMEM236	3.8789	0.0016638		ENSG00000254814		-2.12435	0.0345068
ENSG00000156097	GPR61	3.8434	0.00418853		ENSG00000174586	ZNF497	-2.1163	0.000112446
ENSG00000145198	VWA5B2	3.81675	0.00111818		ENSG00000280120		-2.11552	0.0473792
ENSG00000172349	IL16	3.7407	0.00771191		ENSG00000248213	CICP16	-2.10519	0.0493932
ENSG00000253736		3.7327	0.0495134		ENSG00000164850	GPER1	-2.07378	0.00264915
ENSG00000234911	TEX21P	3.59728	0.01108		ENSG00000172061	LRRC15	-1.99294	0.00879495
ENSG00000179046	TRIML2	3.57573	0.0101935		ENSG00000137573	SULF1	-1.96481	0.0251681
ENSG00000279901		3.54011	0.01714		ENSG00000171962	DRC3	-1.93697	0.00276334
ENSG00000187678	SPRY4	3.53958	0.00016388		ENSG00000275055		-1.90166	0.0142499
ENSG00000270022		3.4778	0.00524576		ENSG00000223573	TINCR	-1.89249	0.00199407
ENSG00000168811	IL12A	3.43121	0.0447261		ENSG00000169271	HSPB3	-1.88148	0.0202528
ENSG00000119630	PGF	3.40133	0.000353413		ENSG00000157064	NMNAT2	-1.85068	0.000443725
ENSG00000198576	ARC	3.37992	2.62087e-19		ENSG00000272462		-1.82284	0.00517882
ENSG00000257497		3.31932	0.00212185		ENSG00000179772	FOXS1	-1.81574	0.0443931
ENSG00000169429	CXCL8	3.28075	3.53815e-06		ENSG00000104081	BMF	-1.81566	9.8942e-08
ENSG00000057657	PRDM1	3.24057	6.78165e-33		ENSG00000185432	METTL7A	-1.78724	2.43948e-05
ENSG00000139318	DUSP6	3.1731	2.55243e-10		ENSG00000151623	NR3C2	-1.76742	4.45642e-06
ENSG00000285999		3.1581	3.44076e-08		ENSG00000186469	GNG2	-1.75409	0.0205337
ENSG00000276317		3.08853	2.09838e-05		ENSG00000273162		-1.74639	0.00574256
ENSG00000177606	JUN	3.01215	1.32287e-87		ENSG00000114670	NEK11	-1.72613	0.0177361
ENSG00000175592	FOSL1	2.96886	5.59804e-18		ENSG00000250615		-1.71863	6.53461e-05
ENSG00000163376	KBTBD8	2.9514	2.36678e-05		ENSG00000170915	PAQR8	-1.715	0.00714962
ENSG00000231881		2.932	0.00359969		ENSG00000278727		-1.70453	0.00346158
ENSG00000182308	DCAF4L1	2.92276	1.0292e-06		ENSG00000253559	OSGEPL1-AS1	-1.66992	0.0245213
ENSG00000170345	FOS	2.92226	3.43266e-32		ENSG00000237984	PTENP1	-1.65153	0.0439801
ENSG00000222009	BTBD19	2.91642	0.00133989		ENSG00000134986	NREP	-1.64895	3.17322e-08
ENSG00000234444	ZNF736	2.88925	0.00956592		ENSG00000090971	NAT14	-1.61809	1.3636e-26
ENSG00000280402		2.88411	0.036955		ENSG00000009950	MLXIPL	-1.5885	0.0305675
ENSG00000272953		2.85604	0.0267593		ENSG00000197587	DMBX1	-1.58035	3.06134e-06
ENSG00000138166	DUSP5	2.83868	5.6696e-43		ENSG00000288538		-1.55167	0.0127237
ENSG00000173535	TNFRSF10C	2.83599	0.0156866		ENSG00000162512	SDC3	-1.54829	4.06197e-08
ENSG00000267481		2.78457	0.0305675		ENSG00000237523	LINC00857	-1.52036	9.38686e-05
ENSG00000109321	AREG	2.77174	4.3484e-10		ENSG00000196456	ZNF775	-1.51086	0.0227181
ENSG00000285106		2.75453	0.00124783		ENSG00000187609	EXD3	-1.50292	2.34468e-09
ENSG00000142627	EPHA2	2.75138	1.22042e-51		ENSG00000175643	RMI2	-1.50262	1.1109e-07
ENSG00000249407	IL20RB-AS1	2.72422	0.0478263		ENSG00000257800	FNBP1P1	-1.50076	0.045166
ENSG00000274021		2.72176	0.000829903		ENSG00000136098	NEK3	-1.48506	1.17289e-06
ENSG00000257181		2.71965	1.28698e-34		ENSG00000180340	FZD2	-1.46961	6.8096e-16
ENSG00000285816		2.69747	0.0352028		ENSG00000142677	IL22RA1	-1.46881	0.0247658
ENSG00000222047	C10orf55	2.68423	0.000561244		ENSG00000182836	PLCXD3	-1.46662	4.21806e-05
ENSG00000108551	RASD1	2.58276	0.000125092		ENSG00000178700	DHFR2	-1.46508	0.00129638
ENSG00000185339	TCN2	2.5521	0.0267935		ENSG00000170689	HOXB9	-1.46273	0.019149
ENSG00000081041	CXCL2	2.54746	1.75726e-06		ENSG00000184481	FOXO4	-1.45863	2.19862e-06
ENSG00000143217	NECTIN4	2.53909	1.95378e-09		ENSG00000275074	NUDT18	-1.45487	0.00251722
ENSG00000183508	TENT5C	2.53842	0.0240372		ENSG00000215196	BASP1-AS1	-1.45016	6.53133e-05
ENSG00000095752	IL11	2.52197	9.59306e-11		ENSG00000274180	NATD1	-1.44731	0.00933132
ENSG00000169252	ADRB2	2.51948	1.29069e-09		ENSG00000170703	TTLL6	-1.44178	0.0050916
ENSG00000162772	ATF3	2.51031	1.47882e-65		ENSG00000121542	SEC22A	-1.44093	0.000221824
ENSG00000116819	TFAP2E	2.5035	0.0131574		ENSG00000246859	STARD4-AS1	-1.4368	5.16559e-14
ENSG00000115008	IL1A	2.49912	0.000715826		ENSG00000181035	SLC25A42	-1.43411	0.00740215
ENSG00000135679	MDM2	2.46865	5.47181e-81		ENSG00000146802	TMEM168	-1.42999	9.05647e-13
ENSG00000258602	LINC01629	2.46785	0.00592882		ENSG00000279399		-1.42754	0.0337111
ENSG00000100292	HMOX1	2.46395	5.74336e-119		ENSG00000198711	SSBP3-AS1	-1.42645	0.0436192
ENSG00000242689	CNTF	2.454	7.82484e-07		ENSG00000187037	GPR141	-1.42418	0.0388714
ENSG00000267898		2.4353	0.00159056		ENSG00000253806		-1.42074	2.81468e-06
ENSG00000126231	PROZ	2.41485	0.0127237		ENSG00000214860	EVPLL	-1.40656	0.0464992
ENSG00000120875	DUSP4	2.3928	1.42663e-53		ENSG00000286367		-1.40077	0.00803802
ENSG00000137331	IER3	2.39084	1.39574e-47		ENSG00000113361	CDH6	-1.397	0.000927056
ENSG00000284669		2.38529	0.00144639		ENSG00000221843	C2orf16	-1.38865	0.00750229
ENSG00000236255		2.37014	4.86607e-05		ENSG00000126787	DLGAP5	-1.38399	1.85803e-18
ENSG00000272273	IER3-AS1	2.35667	3.79751e-33		ENSG00000257831		-1.3819	0.000722265
ENSG00000241322	CDRT1	2.35313	2.31814e-14		ENSG00000077420	APBB1IP	-1.37767	0.0305286
ENSG00000120129	DUSP1	2.33773	2.35238e-132		ENSG00000254578		-1.368	0.00450918
ENSG00000188033	ZNF490	2.3348	0.00069918		ENSG00000163328	GPR155	-1.36216	0.00357633
ENSG00000136158	SPRY2	2.33352	2.677e-13		ENSG00000264575	LINC00526	-1.33804	0.0120907
ENSG00000177173	NAP1L4P1	2.32962	0.00828838		ENSG00000141086	CTRL	-1.33575	0.0422572
ENSG00000279583		2.32885	0.0392037		ENSG00000077063	CTTNBP2	-1.33306	0.000252742
ENSG00000181773	GPR3	2.32506	0.0125702		ENSG00000133138	TBC1D8B	-1.32829	0.0010988
ENSG00000173846	PLK3	2.32166	1.0721e-29		ENSG00000272398	CD24	-1.32599	3.18047e-44
ENSG00000128564	VGF	2.31899	0.00170267		ENSG00000187123	LYPD6	-1.32123	5.28554e-06
ENSG00000228022	HCG20	2.31602	5.52729e-19		ENSG00000239521	CASTOR3	-1.31607	0.00716307
ENSG00000272114		2.30925	4.08846e-22		ENSG00000161664	ASB16	-1.31495	0.0140547
ENSG00000174951	FUT1	2.29628	0.0438332		ENSG00000223764	LINC02593	-1.31471	1.32691e-07
ENSG00000265972	TXNIP	2.29557	9.30198e-19		ENSG00000145358	DDIT4L	-1.31115	0.0300892
ENSG00000232519		2.28486	0.0363002		ENSG00000171227	TMEM37	-1.30976	0.0283608
ENSG00000185022	MAFF	2.27201	3.60974e-22		ENSG00000171224	FAM241B	-1.30797	0.0093612
ENSG00000170961	HAS2	2.2648	1.04154e-15		ENSG00000109705	NKX3-2	-1.30633	0.000134553
ENSG00000146757	ZNF92	2.25515	8.40458e-21		ENSG00000188021	UBQLN2	-1.29882	1.11484e-30
ENSG00000116717	GADD45A	2.2379	7.32975e-132		ENSG00000163995	ABLIM2	-1.29145	3.33137e-14
ENSG00000088826	SMOX	2.2218	3.51764e-19		ENSG00000075461	CACNG4	-1.29029	0.0169846
ENSG00000167046		2.2134	0.0337449		ENSG00000135211	TMEM60	-1.28838	5.90509e-06
ENSG00000164708	PGAM2	2.20093	0.0486232		ENSG00000173456	RNF26	-1.28785	5.41246e-32
ENSG00000215014		2.1912	0.0161143		ENSG00000272405		-1.28493	8.81388e-06
ENSG00000136244	IL6	2.17868	2.27555e-06		ENSG00000136010	ALDH1L2	-1.28334	0.0204321
ENSG00000151014	NOCT	2.17551	2.38555e-22		ENSG00000240694	PNMA2	-1.27831	0.00153327
ENSG00000122861	PLAU	2.17531	3.88548e-06		ENSG00000132749	TESMIN	-1.26499	0.00166634
ENSG00000173530	TNFRSF10D	2.17441	7.66091e-38		ENSG00000173928	SWSAP1	-1.25615	0.0135723
ENSG00000162775	RBM15	2.14757	1.94038e-69		ENSG00000272694		-1.25408	0.00247098
ENSG00000113070	HBEGF	2.13865	2.15598e-32		ENSG00000206417	H1-10-AS1	-1.25339	1.20482e-13
ENSG00000280010		2.11487	0.00530016		ENSG00000160172	FAM86C2P	-1.25337	0.000669991
ENSG00000287644		2.11368	0.000216439		ENSG00000159792	PSKH1	-1.24552	7.95062e-10
ENSG00000240891	PLCXD2	2.11367	1.00498e-20		ENSG00000167549	CORO6	-1.24311	0.00246177
ENSG00000177076	ACER2	2.10859	9.55736e-05		ENSG00000162745	OLFML2B	-1.23409	0.0254239
ENSG00000206077	ZDHHC11B	2.09884	2.12195e-06		ENSG00000198554	WDHD1	-1.23055	1.2051e-21
ENSG00000104689	TNFRSF10A	2.09047	6.17507e-73		ENSG00000107738	VSIR	-1.23027	0.0173408
ENSG00000227220		2.08903	5.04654e-23		ENSG00000250208	FZD10-AS1	-1.22122	7.77441e-08
ENSG00000095951	HIVEP1	2.08672	2.27364e-40		ENSG00000228223	HCG11	-1.2204	2.44117e-10
ENSG00000118523	CCN2	2.08664	4.0288e-25		ENSG00000198814	GK	-1.21784	0.000370125
ENSG00000171223	JUNB	2.06518	4.76398e-285		ENSG00000157796	WDR19	-1.21718	1.13038e-10
ENSG00000087074	PPP1R15A	2.0387	2.30197e-94		ENSG00000156970	BUB1B	-1.21429	3.37782e-23
ENSG00000143333	RGS16	2.02833	0.00127767		ENSG00000143365	RORC	-1.21282	0.00499862
ENSG00000128016	ZFP36	2.02343	1.43801e-29		ENSG00000276710	CSPG4P10	-1.20899	6.94446e-07
ENSG00000172264	MACROD2	2.01243	0.0371885		ENSG00000142102	PGGHG	-1.20887	0.00527386
ENSG00000137801	THBS1	1.99917	7.84635e-46		ENSG00000220785	MTMR9LP	-1.20821	0.0103852
ENSG00000205085	FAM71F2	1.97958	0.0425087		ENSG00000134830	C5AR2	-1.20805	6.4214e-09
ENSG00000124171	PARD6B	1.97748	2.67132e-05		ENSG00000184486	POU3F2	-1.20782	0.0127942
ENSG00000204524	ZNF805	1.97707	1.20748e-15		ENSG00000261326	LINC01355	-1.20725	0.0196159
ENSG00000257453	PHLDA1-AS1	1.97674	5.87585e-09		ENSG00000166407	LMO1	-1.20127	2.15074e-06
ENSG00000136997	MYC	1.97526	8.6901e-173		ENSG00000061455	PRDM6	-1.19424	0.0358747
ENSG00000249375	CASC11	1.96847	2.63342e-77		ENSG00000198496	NBR2	-1.19392	0.0176988
ENSG00000102387	TAF7L	1.96472	0.0440301		ENSG00000153291	SLC25A27	-1.19052	0.00732651
ENSG00000277476		1.96153	0.00886853		ENSG00000163807	KIAA1143	-1.1904	1.56724e-18
ENSG00000023608	SNAPC1	1.95912	1.88264e-11		ENSG00000266933	MADCAM1-AS1	-1.18672	1.18683e-06
ENSG00000260751		1.95627	0.0217811		ENSG00000250802	ZBED3-AS1	-1.18658	0.00391518
ENSG00000162733	DDR2	1.95249	0.0338603		ENSG00000228063	LYPLAL1-DT	-1.18487	0.0404224
ENSG00000203875	SNHG5	1.95095	0.000490121		ENSG00000125843	AP5S1	-1.18147	2.81411e-06
ENSG00000266446		1.94627	0.0197313		ENSG00000286078		-1.18109	3.78096e-05
ENSG00000188818	ZDHHC11	1.94395	0.000422108		ENSG00000160325	CACFD1	-1.17816	1.0694e-06
ENSG00000257551	HLX-AS1	1.93902	0.045889		ENSG00000184897	H1-10	-1.17756	2.2452e-24
ENSG00000164463	CREBRF	1.93899	1.67499e-10		ENSG00000231028	LINC00271	-1.17397	0.0225682
ENSG00000148677	ANKRD1	1.92909	3.13489e-13		ENSG00000186814	ZSCAN30	-1.17201	3.17277e-05
ENSG00000114315	HES1	1.92509	5.18275e-13		ENSG00000245385		-1.17107	3.17277e-05
ENSG00000174500	GCSAM	1.92146	0.0443809		ENSG00000131061	ZNF341	-1.16753	0.00280924
ENSG00000267598		1.92102	9.45047e-98		ENSG00000273373		-1.16309	0.015095
ENSG00000178229	ZNF543	1.91926	2.71127e-08		ENSG00000197557	TTC30A	-1.16231	0.000634217
ENSG00000197044	ZNF441	1.91819	8.57066e-10		ENSG00000272808	GCAWKR	-1.16082	0.0321452
ENSG00000078401	EDN1	1.91535	7.23468e-10		ENSG00000175701	MTLN	-1.16054	0.0130535
ENSG00000250337	PURPL	1.90707	4.0534e-08		ENSG00000103494	RPGRIP1L	-1.15918	1.24967e-08
ENSG00000163659	TIPARP	1.90587	3.53091e-68		ENSG00000267317		-1.15587	0.0113038
ENSG00000205420	KRT6A	1.90243	0.0321403		ENSG00000135709	KIAA0513	-1.15434	0.0068624
ENSG00000267419	ZNF56P	1.89683	0.0104567		ENSG00000181104	F2R	-1.15133	1.2051e-21
ENSG00000272159		1.88678	0.0183732		ENSG00000158246	TENT5B	-1.15122	0.00218989
ENSG00000113369	ARRDC3	1.88445	6.87338e-60		ENSG00000188613	NANOS1	-1.14888	0.0348349
ENSG00000229337		1.87855	0.0366429		ENSG00000132846	ZBED3	-1.14591	5.99364e-12
ENSG00000153234	NR4A2	1.87709	8.44425e-44		ENSG00000273018	FAM106A	-1.13928	0.0330521
ENSG00000265666	RARA-AS1	1.87546	0.00202071		ENSG00000126945	HNRNPH2	-1.13905	1.49495e-26
ENSG00000182585	EPGN	1.87504	2.20057e-05		ENSG00000204792	LINC01291	-1.13423	0.0468582
ENSG00000267141		1.86705	0.0368392		ENSG00000177383	MAGEF1	-1.1267	2.07019e-08
ENSG00000261220	ST3GAL1-DT	1.86502	0.00226547		ENSG00000168646	AXIN2	-1.12591	0.00658794
ENSG00000270792		1.86207	1.94228e-06		ENSG00000255874	PRECSIT	-1.12507	9.28175e-13
ENSG00000270069	MIR222HG	1.85691	0.0167144		ENSG00000128266	GNAZ	-1.12484	0.0150166
ENSG00000260757		1.85494	0.0114153		ENSG00000172687	ZNF738	-1.12324	0.00115428
ENSG00000121068	TBX2	1.8543	0.000288241		ENSG00000183671	CMKLR2	-1.12315	5.43365e-05
ENSG00000101384	JAG1	1.85263	6.34089e-13		ENSG00000183691	NOG	-1.12003	0.0036214
ENSG00000185614	INKA1	1.85203	0.0387958		ENSG00000163683	SMIM14	-1.11638	1.08264e-05
ENSG00000162892	IL24	1.85158	0.0286208		ENSG00000225377	NRSN2-AS1	-1.11404	0.0349669
ENSG00000111252	SH2B3	1.84515	1.18923e-08		ENSG00000174332	GLIS1	-1.11367	0.0247658
ENSG00000142871	CCN1	1.82532	7.72381e-19		ENSG00000215883	CYB5RL	-1.11089	6.98815e-07
ENSG00000134070	IRAK2	1.82512	3.77132e-12		ENSG00000230565	ZNF32-AS2	-1.10622	0.0356764
ENSG00000159388	BTG2	1.82413	3.06846e-17		ENSG00000228274		-1.1062	0.00542642
ENSG00000124216	SNAI1	1.82366	3.3448e-10		ENSG00000142303	ADAMTS10	-1.10564	7.92856e-07
ENSG00000019549	SNAI2	1.82052	1.20281e-27		ENSG00000261971	MMP25-AS1	-1.10356	0.0194114
ENSG00000268812	LIF-AS2	1.82045	5.67543e-07		ENSG00000122970	IFT81	-1.1029	3.81569e-11
ENSG00000160888	IER2	1.81856	5.37214e-114		ENSG00000272770		-1.10251	2.64718e-05
ENSG00000251196		1.78753	0.00308755		ENSG00000006377	DLX6	-1.10084	0.000438289
ENSG00000090339	ICAM1	1.77718	2.88365e-18		ENSG00000135439	AGAP2	-1.09954	1.06978e-06
ENSG00000272240		1.77613	0.038903		ENSG00000239718	HLTF-AS1	-1.09762	0.015899
ENSG00000180667	YOD1	1.76102	9.26601e-27		ENSG00000075240	GRAMD4	-1.09615	0.000103317
ENSG00000139289	PHLDA1	1.7545	5.95413e-22		ENSG00000183161	FANCF	-1.09503	5.70381e-05
ENSG00000108932	SLC16A6	1.75345	9.55742e-20		ENSG00000175130	MARCKSL1	-1.09388	1.63496e-20
ENSG00000234432		1.75255	0.0242578		ENSG00000159184	HOXB13	-1.0931	0.0154688
ENSG00000104856	RELB	1.75147	8.2693e-14		ENSG00000238113	LINC01410	-1.09265	0.00481182
ENSG00000185947	ZNF267	1.74567	7.65869e-10		ENSG00000133067	LGR6	-1.08748	1.11875e-05
ENSG00000163874	ZC3H12A	1.74175	9.39037e-34		ENSG00000184939	ZFP90	-1.08559	0.0068901
ENSG00000278621	THBS1-AS1	1.7309	2.02357e-13		ENSG00000171103	TRMT61B	-1.08539	2.48463e-05
ENSG00000175564	UCP3	1.72708	0.0357053		ENSG00000259431	THTPA	-1.084	0.000529608
ENSG00000101665	SMAD7	1.71957	4.30093e-46		ENSG00000279152		-1.08399	0.00147135
ENSG00000107742	SPOCK2	1.71884	0.000420895		ENSG00000162836	ACP6	-1.08312	0.000513924
ENSG00000231721	LINC-PINT	1.71656	0.000620163		ENSG00000260032	NORAD	-1.08235	6.04502e-54
ENSG00000128342	LIF	1.71508	1.4595e-24		ENSG00000185361	TNFAIP8L1	-1.07604	0.00104599
ENSG00000177125	ZBTB34	1.71433	1.61464e-31		ENSG00000177854	TMEM187	-1.07355	0.0147637
ENSG00000184185	KCNJ12	1.71201	2.67538e-23		ENSG00000168071	CCDC88B	-1.07345	0.00177924
ENSG00000106366	SERPINE1	1.7043	1.60307e-21		ENSG00000047188	YTHDC2	-1.07274	1.77472e-15
ENSG00000279806		1.69926	5.46285e-08		ENSG00000157570	TSPAN18	-1.06635	2.20057e-05
ENSG00000270751	FBXW7-AS1	1.69709	0.0332147		ENSG00000180185	FAHD1	-1.06588	5.06998e-14
ENSG00000183018	SPNS2	1.69314	0.00047178		ENSG00000153214	TMEM87B	-1.06336	9.78585e-05
ENSG00000250714		1.6894	0.00721431		ENSG00000176903	PNMA1	-1.06228	4.74966e-35
ENSG00000283849		1.68876	1.59084e-08		ENSG00000154265	ABCA5	-1.06081	0.0212395
ENSG00000273763		1.6814	0.0173683		ENSG00000139531	SUOX	-1.06051	2.44608e-06
ENSG00000188215	DCUN1D3	1.68102	5.98742e-13		ENSG00000128694	OSGEPL1	-1.0593	0.000575941
ENSG00000271119		1.67236	0.000440252		ENSG00000286450		-1.05649	0.0271308
ENSG00000196428	TSC22D2	1.66681	2.6579e-30		ENSG00000165389	SPTSSA	-1.05421	4.88758e-12
ENSG00000178127	NDUFV2	1.65765	0.0110002		ENSG00000087258	GNAO1	-1.05279	0.0298802
ENSG00000284602		1.65434	0.000905753		ENSG00000231290	APCDD1L-DT	-1.05069	0.000154889
ENSG00000150667	FSIP1	1.64813	6.06673e-17		ENSG00000007237	GAS7	-1.04956	0.0049839
ENSG00000112715	VEGFA	1.64362	4.9739e-53		ENSG00000182612	TSPAN10	-1.0492	0.0106409
ENSG00000135870	RC3H1	1.63801	1.16854e-22		ENSG00000258056	CD63-AS1	-1.0491	0.000252742
ENSG00000269959	SPACA6P-AS	1.63537	0.0016742		ENSG00000112367	FIG4	-1.04813	1.32753e-05
ENSG00000276900		1.63379	0.0133261		ENSG00000121486	TRMT1L	-1.04783	7.47465e-08
ENSG00000154822	PLCL2	1.63216	1.59579e-14		ENSG00000105204	DYRK1B	-1.04564	1.96584e-06
ENSG00000117525	F3	1.6226	1.63033e-26		ENSG00000070371	CLTCL1	-1.04549	1.8428e-11
ENSG00000124145	SDC4	1.58699	1.78605e-36		ENSG00000166963	MAP1A	-1.04375	7.60451e-08
ENSG00000105327	BBC3	1.57875	1.4515e-09		ENSG00000256537	SMIM10L1	-1.03931	2.49999e-15
ENSG00000175105	ZNF654	1.57768	1.16744e-10		ENSG00000177432	NAP1L5	-1.03925	7.29385e-06
ENSG00000246582	TNFRSF10A-DT	1.56902	1.51893e-10		ENSG00000184602	SNN	-1.03917	1.6339e-09
ENSG00000120889	TNFRSF10B	1.567	4.5254e-63		ENSG00000164930	FZD6	-1.03571	2.57831e-12
ENSG00000148926	ADM	1.56349	2.40171e-37		ENSG00000061987	MON2	-1.03534	7.52543e-09
ENSG00000144655	CSRNP1	1.55718	4.50252e-36		ENSG00000135241	PNPLA8	-1.03204	7.85189e-11
ENSG00000124882	EREG	1.55631	0.000299009		ENSG00000279344		-1.03158	0.00205281
ENSG00000184557	SOCS3	1.54852	2.82612e-40		ENSG00000164040	PGRMC2	-1.02616	3.88563e-34
ENSG00000251131		1.54783	2.93284e-07		ENSG00000155254	MARVELD1	-1.02489	2.92081e-16
ENSG00000026103	FAS	1.53	5.4555e-11		ENSG00000238227	TMEM250	-1.01669	3.30928e-24
ENSG00000142279	WTIP	1.52873	9.96606e-11		ENSG00000237172	B3GNT9	-1.01416	2.09867e-08
ENSG00000188167	TMPPE	1.52659	0.00675629		ENSG00000236901	MIR600HG	-1.01198	0.0126976
ENSG00000113448	PDE4D	1.52605	6.55482e-38		ENSG00000160094	ZNF362	-1.01138	7.20283e-07
ENSG00000204531	POU5F1	1.5249	0.0230974		ENSG00000133704	IPO8	-1.00952	2.61013e-18
ENSG00000280383		1.51869	0.00459313		ENSG00000226137	BAIAP2-DT	-1.00866	2.0345e-05
ENSG00000176749	CDK5R1	1.51708	0.000106647		ENSG00000198468	FLVCR1-DT	-1.00778	0.0237518
ENSG00000198039	ZNF273	1.51697	0.00385449		ENSG00000176087	SLC35A4	-1.00747	4.57941e-44
ENSG00000197961	ZNF121	1.51696	1.5587e-21		ENSG00000251209	LINC00923	-1.00451	0.000155528
ENSG00000127528	KLF2	1.51552	3.0541e-09		ENSG00000232931	LINC00342	-1.00448	0.000670234
ENSG00000076641	PAG1	1.51287	1.87729e-07		ENSG00000225407		-1.00438	0.0275397
ENSG00000149948	HMGA2	1.51201	0.000473312		ENSG00000164542	KIAA0895	-1.0036	9.06584e-19
ENSG00000174010	KLHL15	1.51187	4.64343e-22		ENSG00000135845	PIGC	-1.00318	3.57513e-08
ENSG00000278918		1.50607	4.88077e-06		ENSG00000129493	HEATR5A	-1.00286	3.57663e-16
ENSG00000109670	FBXW7	1.5001	1.24792e-15		ENSG00000175283	DOLK	-1.00256	1.84478e-10
ENSG00000286116		1.49091	0.00142264		ENSG00000178695	KCTD12	-1.0018	1.65038e-30
ENSG00000148154	UGCG	1.48072	4.28849e-19		ENSG00000188997	KCTD21	-1.00006	2.71387e-05
ENSG00000171940	ZNF217	1.47652	9.27476e-40
ENSG00000272812		1.47262	0.0463547
ENSG00000125398	SOX9	1.46963	5.98071e-12
ENSG00000113742	CPEB4	1.46275	7.58599e-38
ENSG00000170836	PPM1D	1.46176	6.55146e-19
ENSG00000081665	ZNF506	1.45287	0.0112899
ENSG00000196152	ZNF79	1.45206	8.55148e-15
ENSG00000142528	ZNF473	1.44858	1.13634e-17
ENSG00000167703	SLC43A2	1.44655	2.75952e-11
ENSG00000178502	KLHL11	1.44198	8.17306e-10
ENSG00000163545	NUAK2	1.43119	5.2049e-08
ENSG00000232040	ZBED9	1.43078	8.46955e-05
ENSG00000118620	ZNF430	1.42985	2.11695e-07
ENSG00000023445	BIRC3	1.42583	3.31121e-06
ENSG00000171132	PRKCE	1.4241	8.46262e-10
ENSG00000253392		1.41958	0.000122191
ENSG00000139800	ZIC5	1.41954	1.24815e-10
ENSG00000095066	HOOK2	1.41819	2.10234e-40
ENSG00000143367	TUFT1	1.41406	8.16186e-25
ENSG00000099860	GADD45B	1.41326	3.59015e-22
ENSG00000149289	ZC3H12C	1.41268	1.11849e-11
ENSG00000111860	CEP85L	1.41223	0.000112459
ENSG00000256771	ZNF253	1.40837	0.00418866
ENSG00000139926	FRMD6	1.39944	1.38306e-17
ENSG00000155592	ZKSCAN2	1.39873	2.65922e-14
ENSG00000151414	NEK7	1.39261	2.12332e-26
ENSG00000145632	PLK2	1.38863	8.3059e-44
ENSG00000115963	RND3	1.38519	1.28557e-27
ENSG00000253653		1.3815	0.0464656
ENSG00000156232	WHAMM	1.38084	2.06091e-09
ENSG00000008735	MAPK8IP2	1.37989	1.54625e-05
ENSG00000177426	TGIF1	1.37666	8.60732e-43
ENSG00000168826	ZBTB49	1.37557	2.18622e-05
ENSG00000173334	TRIB1	1.37528	3.26512e-14
ENSG00000084093	REST	1.37484	5.60969e-15
ENSG00000112182	BACH2	1.37083	0.0318157
ENSG00000173531	MST1	1.36853	0.00453507
ENSG00000183604	SMG1P5	1.36704	0.0388159
ENSG00000141384	TAF4B	1.36659	8.1202e-06
ENSG00000048392	RRM2B	1.36234	9.74326e-12
ENSG00000182389	CACNB4	1.36214	0.0354595
ENSG00000116285	ERRFI1	1.36089	3.26829e-23
ENSG00000154734	ADAMTS1	1.35919	2.84213e-30
ENSG00000148200	NR6A1	1.35698	3.24264e-06
ENSG00000132326	PER2	1.35641	1.02882e-07
ENSG00000267607		1.35396	0.000751977
ENSG00000151151	IPMK	1.34677	1.56109e-10
ENSG00000223820	CFL1P1	1.34628	0.000865946
ENSG00000184979	USP18	1.34605	0.0220611
ENSG00000198780	FAM169A	1.34519	2.36678e-05
ENSG00000027075	PRKCH	1.34108	0.00165908
ENSG00000105649	RAB3A	1.34106	3.44446e-05
ENSG00000175197	DDIT3	1.34093	5.39713e-06
ENSG00000235436	DPY19L2P4	1.33922	0.045918
ENSG00000240053	LY6G5B	1.33524	0.0432958
ENSG00000146587	RBAK	1.32767	1.45975e-13
ENSG00000170802	FOXN2	1.32587	7.95922e-13
ENSG00000011422	PLAUR	1.32505	2.87576e-22
ENSG00000233547		1.32475	0.00119226
ENSG00000186130	ZBTB6	1.32422	3.34765e-11
ENSG00000197061	H4C3	1.32233	0.00387868
ENSG00000034152	MAP2K3	1.31493	2.85504e-17
ENSG00000053438	NNAT	1.31388	0.00556711
ENSG00000287387		1.3126	0.000151115
ENSG00000176692	FOXC2	1.31158	2.67311e-19
ENSG00000176907	TCIM	1.30931	7.41937e-30
ENSG00000103196	CRISPLD2	1.3076	0.00361438
ENSG00000251034		1.30725	0.0470073
ENSG00000106089	STX1A	1.30595	3.73835e-08
ENSG00000143507	DUSP10	1.30391	1.2951e-08
ENSG00000155846	PPARGC1B	1.30333	9.22665e-15
ENSG00000140836	ZFHX3	1.3026	2.73363e-47
ENSG00000181722	ZBTB20	1.29679	0.00535844
ENSG00000148841	ITPRIP	1.29509	1.44759e-59
ENSG00000244405	ETV5	1.2949	0.0024855
ENSG00000282936		1.29139	0.000178439
ENSG00000182141	ZNF708	1.28771	0.000115056
ENSG00000109220	CHIC2	1.28626	8.36024e-07
ENSG00000213799	ZNF845	1.28302	7.48765e-07
ENSG00000174028	FAM3C2P	1.28281	0.000549175
ENSG00000137936	BCAR3	1.28223	2.75813e-23
ENSG00000273729		1.27831	4.69947e-07
ENSG00000118503	TNFAIP3	1.27676	2.70955e-20
ENSG00000226890		1.27544	0.00161363
ENSG00000260944	FOXC2-AS1	1.27294	0.000268656
ENSG00000154359	LONRF1	1.26694	0.0358556
ENSG00000164309	CMYA5	1.26565	0.0285953
ENSG00000142867	BCL10	1.26507	7.28711e-10
ENSG00000173258	ZNF483	1.26492	0.00453439
ENSG00000074590	NUAK1	1.26439	1.415e-30
ENSG00000174718	RESF1	1.26207	3.55127e-07
ENSG00000132510	KDM6B	1.25432	6.3826e-14
ENSG00000124762	CDKN1A	1.25428	4.20607e-33
ENSG00000155090	KLF10	1.25156	1.12449e-37
ENSG00000174579	MSL2	1.25088	8.64943e-16
ENSG00000172375	C2CD2L	1.24635	3.17322e-08
ENSG00000135477	KRT87P	1.24567	0.00161997
ENSG00000197933	ZNF823	1.24536	0.00472226
ENSG00000197857	ZNF44	1.24177	4.3374e-06
ENSG00000198482	ZNF808	1.23933	0.00422757
ENSG00000258136		1.23924	0.00197756
ENSG00000097096	SYDE2	1.23672	0.000110611
ENSG00000182903	ZNF721	1.23591	4.89064e-06
ENSG00000164603	BMT2	1.23588	0.00149822
ENSG00000163235	TGFA	1.2358	0.0317519
ENSG00000146232	NFKBIE	1.2316	0.000189236
ENSG00000186300	ZNF555	1.23058	0.00910168
ENSG00000253618	GRPEL2-AS1	1.2299	0.000200079
ENSG00000224093	BCAR3-AS1	1.2282	3.84351e-08
ENSG00000185483	ROR1	1.22324	0.000222357
ENSG00000083844	ZNF264	1.22253	2.67748e-10
ENSG00000148339	SLC25A25	1.22132	4.06939e-33
ENSG00000105227	PRX	1.22096	0.0188914
ENSG00000107864	CPEB3	1.21543	0.0090634
ENSG00000260942	CAPN10-DT	1.20916	0.00121331
ENSG00000241990	PRR34-AS1	1.20661	0.0308936
ENSG00000221949	LINC01465	1.20539	0.0220721
ENSG00000111696	NT5DC3	1.20433	1.84198e-08
ENSG00000172667	ZMAT3	1.20392	2.98823e-10
ENSG00000181026	AEN	1.20388	5.79522e-30
ENSG00000197670		1.20325	0.0143127
ENSG00000286837		1.20003	0.000626892
ENSG00000141682	PMAIP1	1.19968	1.01131e-13
ENSG00000116741	RGS2	1.19886	4.70597e-10
ENSG00000256087	ZNF432	1.19822	1.10737e-06
ENSG00000083817	ZNF416	1.19653	1.14958e-05
ENSG00000132003	ZSWIM4	1.19628	3.47479e-16
ENSG00000173110	HSPA6	1.19597	0.00384824
ENSG00000176597	B3GNT5	1.1949	5.66427e-05
ENSG00000196417	ZNF765	1.18705	4.34251e-07
ENSG00000198346	ZNF813	1.17582	0.00789582
ENSG00000267519	MIR23AHG	1.17474	8.73001e-23
ENSG00000170684	ZNF296	1.17319	0.000354707
ENSG00000218018	RBM38-AS1	1.17131	0.00494526
ENSG00000178726	THBD	1.17041	0.000331483
ENSG00000116299	ELAPOR1	1.16966	0.00210012
ENSG00000117036	ETV3	1.1688	2.65636e-18
ENSG00000145220	LYAR	1.16821	2.4192e-17
ENSG00000099625	CBARP	1.16652	8.71721e-11
ENSG00000105085	MED26	1.15885	2.15074e-06
ENSG00000104228	TRIM35	1.15817	5.77162e-14
ENSG00000196110	ZNF699	1.15529	0.0169712
ENSG00000287917		1.15408	0.0278769
ENSG00000280273		1.15182	0.0111239
ENSG00000130766	SESN2	1.14875	3.44507e-09
ENSG00000170525	PFKFB3	1.14811	4.62996e-28
ENSG00000121406	ZNF549	1.14628	0.0103871
ENSG00000100068	LRP5L	1.14624	0.00072712
ENSG00000164938	TP53INP1	1.13767	5.58324e-05
ENSG00000173281	PPP1R3B	1.13721	8.60411e-07
ENSG00000116514	RNF19B	1.13698	3.84743e-18
ENSG00000255248	MIR100HG	1.13382	0.00658794
ENSG00000067082	KLF6	1.13207	1.02951e-32
ENSG00000175556	LONRF3	1.13184	2.19282e-11
ENSG00000170949	ZNF160	1.13178	3.71428e-06
ENSG00000143842	SOX13	1.12882	3.58054e-15
ENSG00000102908	NFAT5	1.12815	1.02033e-08
ENSG00000150457	LATS2	1.12713	4.03493e-19
ENSG00000198538	ZNF28	1.12668	4.75346e-08
ENSG00000213096	ZNF254	1.126	0.000130031
ENSG00000259768		1.1251	2.27918e-08
ENSG00000147650	LRP12	1.12301	6.20182e-09
ENSG00000108256	NUFIP2	1.12162	1.00421e-19
ENSG00000115641	FHL2	1.12125	2.52512e-36
ENSG00000101096	NFATC2	1.1192	5.55173e-06
ENSG00000131759	RARA	1.11723	8.73663e-11
ENSG00000197182	MIRLET7BHG	1.11717	0.000205638
ENSG00000196408	NOXO1	1.11517	0.00225885
ENSG00000228526	MIR34AHG	1.11216	3.66564e-08
ENSG00000185753	CXorf38	1.11106	8.82769e-07
ENSG00000166860	ZBTB39	1.10487	1.53887e-06
ENSG00000157617	C2CD2	1.10144	2.5374e-08
ENSG00000180257	ZNF816	1.09928	0.0191008
ENSG00000130164	LDLR	1.09691	2.19472e-27
ENSG00000007944	MYLIP	1.0903	0.00698918
ENSG00000213337	ANKRD39	1.08989	0.0342184
ENSG00000125968	ID1	1.08919	4.81422e-19
ENSG00000170681	CAVIN4	1.0881	0.0275159
ENSG00000234797	RPS3AP6	1.08682	0.0189984
ENSG00000175073	VCPIP1	1.08112	1.21352e-10
ENSG00000197019	SERTAD1	1.07843	5.4626e-09
ENSG00000100647	SUSD6	1.07699	1.31976e-05
ENSG00000231160	KLF3-AS1	1.07619	9.1629e-05
ENSG00000148400	NOTCH1	1.0757	5.91443e-21
ENSG00000170385	SLC30A1	1.07297	2.15598e-32
ENSG00000119508	NR4A3	1.07284	2.46675e-11
ENSG00000106546	AHR	1.06815	3.7012e-12
ENSG00000169914	OTUD3	1.06739	2.01064e-12
ENSG00000170542	SERPINB9	1.06603	0.0434831
ENSG00000138678	GPAT3	1.06508	7.26988e-07
ENSG00000198042	MAK16	1.06193	2.07424e-15
ENSG00000198774	RASSF9	1.06028	0.00340417
ENSG00000112773	TENT5A	1.06017	3.07014e-21
ENSG00000279491		1.05938	0.000124946
ENSG00000169155	ZBTB43	1.05873	5.91943e-12
ENSG00000119669	IRF2BPL	1.05804	1.71042e-20
ENSG00000148143	ZNF462	1.05235	5.90208e-05
ENSG00000008513	ST3GAL1	1.05126	4.0635e-30
ENSG00000158050	DUSP2	1.04912	1.42633e-05
ENSG00000274925	ZKSCAN2-DT	1.04866	0.00291743
ENSG00000130449	ZSWIM6	1.0464	6.29999e-13
ENSG00000188295	ZNF669	1.04609	0.00249052
ENSG00000146072	TNFRSF21	1.04566	1.14694e-13
ENSG00000237296	SMG1P1	1.0449	0.00360342
ENSG00000104419	NDRG1	1.04431	1.11278e-37
ENSG00000196182	STK40	1.0408	7.85189e-11
ENSG00000131845	ZNF304	1.03982	8.21714e-09
ENSG00000112406	HECA	1.03889	0.000116936
ENSG00000228919		1.03864	0.0047313
ENSG00000104312	RIPK2	1.03771	2.21605e-08
ENSG00000157540	DYRK1A	1.03718	1.53254e-17
ENSG00000273066		1.03612	0.0261801
ENSG00000115844	DLX2	1.03586	3.51661e-11
ENSG00000057294	PKP2	1.03504	0.000379701
ENSG00000279333		1.03365	3.55907e-05
ENSG00000107554	DNMBP	1.02732	1.31502e-25
ENSG00000065526	SPEN	1.027	6.07917e-37
ENSG00000275342	PRAG1	1.02687	8.42378e-16
ENSG00000172748	ZNF596	1.02664	0.0161498
ENSG00000148737	TCF7L2	1.0241	6.29175e-18
ENSG00000174564	IL20RB	1.02335	0.0439801
ENSG00000099250	NRP1	1.02295	8.88624e-11
ENSG00000261609	GAN	1.02163	9.30072e-08
ENSG00000143751	SDE2	1.02049	4.95049e-09
ENSG00000079335	CDC14A	1.01736	0.00261635
ENSG00000127081	ZNF484	1.01631	0.00732365
ENSG00000077150	NFKB2	1.01284	1.01131e-13
ENSG00000164949	GEM	1.01006	6.328e-07
ENSG00000235831	BHLHE40-AS1	1.00949	4.58053e-10
ENSG00000107984	DKK1	1.00929	0.000155209
ENSG00000079337	RAPGEF3	1.00835	0.00192518
ENSG00000168685	IL7R	1.0074	0.00059764
ENSG00000162852	CNST	1.0065	1.98309e-08
ENSG00000088451	TGDS	1.00591	4.05252e-06
ENSG00000118515	SGK1	1.00387	1.60369e-26
ENSG00000159216	RUNX1	1.00341	1.10486e-11
ENSG00000270075		1.00307	8.38041e-11
ENSG00000023171	GRAMD1B	1.0004	4.55706e-13
ENSG00000136603	SKIL	1.00027	1.26753e-10
ENSG00000152518	ZFP36L2	1.00021	8.69302e-17

## Sheet: L-r(GA)20
L-r(GA)20_Upregulated					L-r(GA)20_Downregulated
ENSEMBL ID	external_gene_name	log2FoldChange	padj		ENSEMBL ID	gene_name	log2FoldChange	padj
ENSG00000163739	CXCL1	7.44866	6.99181e-07		ENSG00000144285	SCN1A	-6.62772	1.88811e-05
ENSG00000234219	CDCA4P4	7.32245	1.24799e-06		ENSG00000138639	ARHGAP24	-5.97953	0.000144352
ENSG00000171931	FBXW10	7.21566	1.14221e-06		ENSG00000286989		-5.86659	3.79943e-05
ENSG00000198342	ZNF442	7.0256	2.02643e-05		ENSG00000267414	SETBP1-DT	-5.704	0.00186893
ENSG00000109063	MYH3	6.99869	1.43325e-05		ENSG00000130675	MNX1	-5.65034	0.00110292
ENSG00000213386		6.4718	0.00123536		ENSG00000236658		-5.55525	0.0055675
ENSG00000068976	PYGM	6.2697	0.000440126		ENSG00000279028		-5.45487	0.00136745
ENSG00000110427	KIAA1549L	6.20105	0.00023083		ENSG00000163827	LRRC2	-5.45364	0.00650068
ENSG00000276700	RNA5-8SN4	6.06859	0.00497615		ENSG00000260528	FAM157C	-5.40879	0.00274006
ENSG00000232716		5.98888	0.00492024		ENSG00000164100	NDST3	-5.34549	0.00104877
ENSG00000169403	PTAFR	5.95469	0.00492343		ENSG00000287672		-5.26561	0.0112268
ENSG00000213970		5.91935	0.00453335		ENSG00000249476		-5.25689	0.00679463
ENSG00000269420	PLA2G4C-AS1	5.90911	0.00219352		ENSG00000285294	LINC00842	-5.25075	0.00605085
ENSG00000197748	CFAP43	5.79796	0.00170359		ENSG00000229558	SACS-AS1	-5.24841	0.0125659
ENSG00000207005	RNU1-2	5.77042	0.00334778		ENSG00000182327	GLTPD2	-5.22966	0.00338553
ENSG00000270681		5.69853	0.00402294		ENSG00000178015	GPR150	-5.21534	0.0278794
ENSG00000267405		5.48586	0.0179547		ENSG00000254231	WWP1-AS1	-5.1574	0.00810536
ENSG00000147655	RSPO2	5.45655	0.0236297		ENSG00000188906	LRRK2	-5.10526	0.025238
ENSG00000169896	ITGAM	5.43358	0.0197067		ENSG00000161281	COX7A1	-5.04721	0.0210895
ENSG00000168314	MOBP	5.36011	0.0394236		ENSG00000259081		-5.04394	0.0042778
ENSG00000253295		5.34772	0.0297952		ENSG00000267529		-5.03849	0.0425195
ENSG00000130701	RBBP8NL	5.30659	0.00413078		ENSG00000203943	SAMD13	-5.02144	0.0307119
ENSG00000232810	TNF	5.30189	0.0339093		ENSG00000283355		-5.01766	0.00309601
ENSG00000275894		5.26873	0.0033199		ENSG00000215458	AATBC	-5.01042	0.00809121
ENSG00000125740	FOSB	5.21894	6.57495e-71		ENSG00000259570		-4.98422	0.0265803
ENSG00000230064		5.1824	0.0070237		ENSG00000234477		-4.98021	0.0393166
ENSG00000276517		5.17937	0.0117132		ENSG00000268649		-4.94123	0.00667741
ENSG00000267582		5.16016	0.0426555		ENSG00000226853		-4.92427	0.0196978
ENSG00000255202		5.14715	0.0139368		ENSG00000239697	TNFSF12	-4.9135	0.0212564
ENSG00000186517	ARHGAP30	5.14345	0.0183876		ENSG00000278090	LUNAR1	-4.89748	0.00223201
ENSG00000027644	INSRR	5.11393	0.0447223		ENSG00000224034	LINC02561	-4.87976	0.00905986
ENSG00000270722	RNVU1-31	5.0801	0.00986723		ENSG00000232682		-4.86613	0.0118625
ENSG00000179921	GPBAR1	5.01507	0.0248079		ENSG00000279425		-4.8191	0.0102985
ENSG00000232536		4.99953	0.00369419		ENSG00000273196		-4.81546	0.0184359
ENSG00000126562	WNK4	4.90856	0.00553086		ENSG00000137561	TTPA	-4.78545	0.0147241
ENSG00000286669		4.8143	0.0155375		ENSG00000248916	NUP210P3	-4.69928	0.0325884
ENSG00000259868		4.80626	0.0258719		ENSG00000285955		-4.69335	0.0415153
ENSG00000287620		4.74916	0.0411335		ENSG00000279662		-4.68193	0.0272615
ENSG00000168811	IL12A	4.74062	0.00154758		ENSG00000180269	GPR139	-4.65842	0.0180682
ENSG00000273768	RNVU1-29	4.72083	0.0211334		ENSG00000277232	GTSE1-DT	-4.64331	0.00712695
ENSG00000198939	ZFP2	4.67872	0.0425784		ENSG00000226277		-4.64164	0.0419362
ENSG00000125551	PLGLB2	4.66809	0.0490921		ENSG00000269843		-4.62508	0.0193274
ENSG00000171786	NHLH1	4.55555	0.0056873		ENSG00000280069		-4.57569	0.0382502
ENSG00000110876	SELPLG	4.55057	0.00681803		ENSG00000256742	KDM2B-DT	-4.56194	0.0388795
ENSG00000287721		4.5407	0.0360578		ENSG00000259409	BMF-AS1	-4.5542	5.29686e-11
ENSG00000185304	RGPD2	4.53807	0.034658		ENSG00000220517	ASS1P1	-4.53668	0.039872
ENSG00000213189	BTF3L4P2	4.53775	0.0406912		ENSG00000219470		-4.52292	0.0261075
ENSG00000225573	RPL35P5	4.52134	0.0396848		ENSG00000255092		-4.51945	0.0275915
ENSG00000260278	BMP2K-DT	4.44061	0.00244582		ENSG00000231616		-4.51285	0.03881
ENSG00000279584		4.42248	0.0331124		ENSG00000286324		-4.50874	0.000610731
ENSG00000187678	SPRY4	4.40338	5.08734e-07		ENSG00000224429	LINC00539	-4.45116	0.0349274
ENSG00000169429	CXCL8	4.3865	2.83302e-11		ENSG00000230896		-4.44918	0.0128095
ENSG00000229299		4.36251	0.0447973		ENSG00000184524	CEND1	-4.4375	0.0226867
ENSG00000173486	FKBP2	4.35408	0.0442289		ENSG00000224609	FGGY-DT	-4.42	0.0159963
ENSG00000228322		4.34297	0.0494676		ENSG00000005981	ASB4	-4.41238	0.0301307
ENSG00000122877	EGR2	4.32359	3.18847e-05		ENSG00000236921		-4.40518	0.032595
ENSG00000099284	MACROH2A2	4.32052	0.00844081		ENSG00000222383	RNA5SP203	-4.37299	0.0407912
ENSG00000158445	KCNB1	4.27233	0.0263681		ENSG00000168405	CMAHP	-4.36467	0.0459659
ENSG00000104856	RELB	4.24138	1.86803e-85		ENSG00000248206		-4.3482	0.0148575
ENSG00000120738	EGR1	4.21258	5.7221e-154		ENSG00000269938		-4.31558	0.0272295
ENSG00000168952	STXBP6	4.19533	0.0172006		ENSG00000254933		-4.3035	0.0423844
ENSG00000179388	EGR3	4.16298	0.00825504		ENSG00000267710	EDDM13	-4.28244	0.0371036
ENSG00000260633		4.14379	0.0310099		ENSG00000236780	LINC01829	-4.27363	0.0301778
ENSG00000172602	RND1	4.10512	0.0210468		ENSG00000238832		-4.21794	0.0275006
ENSG00000124134	KCNS1	4.10382	0.0448438		ENSG00000276075		-4.17574	0.0277354
ENSG00000115008	IL1A	4.0769	5.83612e-10		ENSG00000229692	SOS1-IT1	-4.16575	0.00337641
ENSG00000211454	AKR7L	4.04747	0.0308724		ENSG00000212237	RNA5SP18	-3.99916	0.0272504
ENSG00000175592	FOSL1	3.91885	1.05221e-31		ENSG00000235387	SPAAR	-3.93707	0.0152905
ENSG00000270022		3.9039	0.000771626		ENSG00000110799	VWF	-3.8272	0.0206293
ENSG00000130513	GDF15	3.89904	3.3441e-73		ENSG00000105880	DLX5	-3.78191	0.000373133
ENSG00000198576	ARC	3.8487	1.11667e-25		ENSG00000284600		-3.75621	0.0358795
ENSG00000139318	DUSP6	3.68368	2.58447e-14		ENSG00000262766		-3.75503	0.00862131
ENSG00000253736		3.67182	0.0404536		ENSG00000171817	ZNF540	-3.74273	0.00887725
ENSG00000274021		3.64034	1.10128e-06		ENSG00000264443	NCMAP-DT	-3.69021	0.000195987
ENSG00000263050		3.63372	0.00120976		ENSG00000104081	BMF	-3.67415	1.70936e-27
ENSG00000081041	CXCL2	3.60736	3.64857e-13		ENSG00000229207	SERPINH1P1	-3.59962	0.0413303
ENSG00000197647	ZNF433	3.60631	0.00338807		ENSG00000279940		-3.58019	0.0295206
ENSG00000265972	TXNIP	3.59359	6.96989e-48		ENSG00000227848	SUCLA2-AS1	-3.55215	0.0117978
ENSG00000288528		3.48614	0.00698979		ENSG00000286276		-3.48927	0.00701065
ENSG00000275405	U1	3.47973	0.0130098		ENSG00000236423	LINC01134	-3.39767	0.00449855
ENSG00000065618	COL17A1	3.44029	0.0477808		ENSG00000232815	DUX4L50	-3.34124	2.47882e-05
ENSG00000271503	CCL5	3.40349	0.000745274		ENSG00000230061	TRPM2-AS	-3.331	0.0343176
ENSG00000142627	EPHA2	3.39629	3.23021e-79		ENSG00000260077		-3.29226	0.00365604
ENSG00000138166	DUSP5	3.37553	9.20848e-62		ENSG00000176919	C8G	-3.29023	0.0267886
ENSG00000265692	LINC01970	3.36271	0.0251603		ENSG00000276248		-3.28726	3.02417e-05
ENSG00000223356		3.29771	0.0305775		ENSG00000145358	DDIT4L	-3.24701	6.64829e-07
ENSG00000178404	CEP295NL	3.26348	0.00616327		ENSG00000233871	DLG5-AS1	-3.22001	0.0200198
ENSG00000088826	SMOX	3.23233	4.5109e-42		ENSG00000214274	ANG	-3.19773	0.00212035
ENSG00000134070	IRAK2	3.22885	3.11169e-39		ENSG00000269044		-3.18656	0.0112114
ENSG00000225173		3.22715	0.033039		ENSG00000186487	MYT1L	-3.15817	0.0124355
ENSG00000219665	ZNF433-AS1	3.19474	0.0182405		ENSG00000258857		-3.13377	0.0362123
ENSG00000151702	FLI1	3.15093	0.001885		ENSG00000255176		-3.13026	0.00692255
ENSG00000116717	GADD45A	3.13926	6.75233e-264		ENSG00000173376	NDNF	-3.09854	0.0220321
ENSG00000170345	FOS	3.13818	1.30164e-37		ENSG00000158714	SLAMF8	-3.02886	0.00302552
ENSG00000095752	IL11	3.1147	1.22822e-16		ENSG00000011465	DCN	-3.02118	0.0446096
ENSG00000218418		3.09387	0.000188346		ENSG00000224546	EIF4BP3	-3.0109	2.46813e-06
ENSG00000259205	PRKXP1	3.06346	0.044564		ENSG00000285923		-2.97116	0.01913
ENSG00000173846	PLK3	3.0209	1.82533e-51		ENSG00000280739	EIF1B-AS1	-2.95226	0.0257921
ENSG00000163376	KBTBD8	3.00375	8.06706e-06		ENSG00000224905		-2.89688	0.0163942
ENSG00000257497		2.99357	0.00455833		ENSG00000288611	NPBWR1	-2.8965	0.00141437
ENSG00000136244	IL6	2.98447	4.81808e-12		ENSG00000013016	EHD3	-2.89009	0.038463
ENSG00000276317		2.97522	2.4867e-05		ENSG00000134830	C5AR2	-2.87821	1.58044e-39
ENSG00000136158	SPRY2	2.96715	4.85656e-22		ENSG00000285588		-2.87458	0.00920942
ENSG00000183508	TENT5C	2.89789	0.00509023		ENSG00000259705	FBN1-DT	-2.86731	0.000176679
ENSG00000179046	TRIML2	2.89331	0.0372835		ENSG00000109101	FOXN1	-2.8631	0.00410934
ENSG00000162772	ATF3	2.87166	9.66159e-87		ENSG00000146411	SLC2A12	-2.86006	1.05242e-05
ENSG00000128564	VGF	2.86676	2.55842e-05		ENSG00000278998		-2.83708	0.00749463
ENSG00000120875	DUSP4	2.85962	1.72579e-77		ENSG00000205464	ATP6AP1L	-2.82434	4.58127e-06
ENSG00000146232	NFKBIE	2.83601	1.38185e-22		ENSG00000280179	CH507-42P11.6	-2.82318	0.0497278
ENSG00000156097	GPR61	2.81072	0.0406602		ENSG00000133138	TBC1D8B	-2.80471	1.04884e-11
ENSG00000168918	INPP5D	2.78987	0.0423817		ENSG00000263786		-2.78497	0.0167627
ENSG00000162654	GBP4	2.78372	0.00291115		ENSG00000204882	GPR20	-2.77747	0.037625
ENSG00000113070	HBEGF	2.7676	3.38158e-55		ENSG00000230479		-2.77318	0.00340115
ENSG00000056558	TRAF1	2.76688	4.98729e-07		ENSG00000187650	VMAC	-2.77222	0.0171799
ENSG00000185022	MAFF	2.73144	7.45887e-33		ENSG00000214145	LINC00887	-2.76724	0.0149907
ENSG00000226380		2.71628	0.00228152		ENSG00000172594	SMPDL3A	-2.75945	2.39891e-13
ENSG00000023445	BIRC3	2.71493	1.85432e-22		ENSG00000260597		-2.73696	2.87275e-05
ENSG00000251196		2.6585	8.58345e-07		ENSG00000254416	LINC02732	-2.73465	0.00121316
ENSG00000162892	IL24	2.64784	0.000383494		ENSG00000260604		-2.73074	7.07084e-10
ENSG00000143333	RGS16	2.63893	5.18582e-06		ENSG00000232648		-2.69536	0.0196824
ENSG00000168389	MFSD2A	2.6314	0.00296693		ENSG00000223703		-2.68466	0.0472759
ENSG00000279583		2.62615	0.0112119		ENSG00000248846	LINC02065	-2.68221	0.000186273
ENSG00000205537		2.61259	0.00179206		ENSG00000253686	LINC01484	-2.68208	2.44086e-05
ENSG00000196421	C20orf204	2.58193	0.00568104		ENSG00000272695	GAS6-DT	-2.68049	0.0135812
ENSG00000184361	SPATA32	2.58126	0.0423817		ENSG00000188816	HMX2	-2.66915	0.00288649
ENSG00000229873	OGFR-AS1	2.56535	0.0161668		ENSG00000247095	MIR210HG	-2.66337	0.0232498
ENSG00000285646		2.55376	0.0203489		ENSG00000182359	KBTBD3	-2.65713	0.024947
ENSG00000109321	AREG	2.54986	6.55183e-09		ENSG00000185432	METTL7A	-2.64195	9.06488e-10
ENSG00000077150	NFKB2	2.53568	1.22563e-87		ENSG00000287974		-2.61844	0.0313876
ENSG00000215014		2.53452	0.00248123		ENSG00000275055		-2.61628	0.000642717
ENSG00000272159		2.48477	0.000558779		ENSG00000117407	ARTN	-2.61497	0.00778968
ENSG00000057657	PRDM1	2.47481	2.34654e-19		ENSG00000156687	UNC5D	-2.6099	9.46982e-08
ENSG00000222009	BTBD19	2.4738	0.0059443		ENSG00000185130	H2BC13	-2.58449	0.0486561
ENSG00000090339	ICAM1	2.45595	1.27121e-35		ENSG00000183671	CMKLR2	-2.57698	2.95392e-18
ENSG00000283849		2.43486	3.43893e-18		ENSG00000187037	GPR141	-2.56571	0.000145285
ENSG00000234444	ZNF736	2.40881	0.0291544		ENSG00000239521	CASTOR3	-2.55877	1.19671e-07
ENSG00000163545	NUAK2	2.40522	7.05932e-23		ENSG00000198237	GUSBP13	-2.55593	0.0418257
ENSG00000272273	IER3-AS1	2.39013	1.58132e-34		ENSG00000134986	NREP	-2.55528	8.17679e-19
ENSG00000057294	PKP2	2.38916	6.74237e-21		ENSG00000236404	VLDLR-AS1	-2.55423	0.034711
ENSG00000182324	KCNJ14	2.3719	1.72843e-05		ENSG00000139508	SLC46A3	-2.54733	0.00434119
ENSG00000169252	ADRB2	2.37101	6.88148e-09		ENSG00000261326	LINC01355	-2.54453	3.71425e-07
ENSG00000265666	RARA-AS1	2.35546	2.51592e-05		ENSG00000164932	CTHRC1	-2.54215	0.00502283
ENSG00000119630	PGF	2.35353	0.0167241		ENSG00000183798	EMILIN3	-2.53961	0.0203895
ENSG00000205362	MT1A	2.35052	0.0290487		ENSG00000184194	GPR173	-2.52389	1.08173e-06
ENSG00000257453	PHLDA1-AS1	2.35043	6.63498e-13		ENSG00000197587	DMBX1	-2.51803	1.45626e-12
ENSG00000138623	SEMA7A	2.34556	0.00943955		ENSG00000260802	SERTM2	-2.51223	0.0339724
ENSG00000144655	CSRNP1	2.32999	3.76137e-83		ENSG00000175946	KLHL38	-2.49499	0.0212972
ENSG00000153234	NR4A2	2.32699	9.4764e-69		ENSG00000137872	SEMA6D	-2.49326	0.0146565
ENSG00000173535	TNFRSF10C	2.3235	0.0456883		ENSG00000120328	PCDHB12	-2.48603	0.00535311
ENSG00000228022	HCG20	2.32301	1.62344e-19		ENSG00000273249	WDR5-DT	-2.47952	0.00591004
ENSG00000163661	PTX3	2.32286	0.0224132		ENSG00000270133		-2.46384	0.0093054
ENSG00000184979	USP18	2.32202	4.07202e-06		ENSG00000245864	MEF2C-AS2	-2.46061	0.0303657
ENSG00000257135	ODC1-DT	2.31936	0.0102798		ENSG00000182771	GRID1	-2.45754	0.00686288
ENSG00000091879	ANGPT2	2.3124	0.0465156		ENSG00000214776		-2.45499	0.0137695
ENSG00000124145	SDC4	2.30843	1.30213e-78		ENSG00000270964	MAP2K5-DT	-2.45145	0.0157797
ENSG00000177606	JUN	2.30165	2.99389e-51		ENSG00000169758	TMEM266	-2.4396	0.0239584
ENSG00000152284	TCF7L1	2.29658	0.0151345		ENSG00000261156	LINC01989	-2.43886	0.00900461
ENSG00000222047	C10orf55	2.29245	0.0028671		ENSG00000231340	ACTG1P10	-2.43631	0.0490658
ENSG00000108551	RASD1	2.28966	0.000551249		ENSG00000221843	C2orf16	-2.42177	2.85866e-06
ENSG00000137331	IER3	2.26404	4.85266e-43		ENSG00000132122	SPATA6	-2.41844	0.0146953
ENSG00000087074	PPP1R15A	2.24877	2.63444e-115		ENSG00000228933		-2.41593	0.0216481
ENSG00000131480	AOC2	2.22681	0.0135913		ENSG00000006377	DLX6	-2.38399	1.23751e-13
ENSG00000143248	RGS5	2.22357	0.0228554		ENSG00000138100	TRIM54	-2.38194	0.000125618
ENSG00000148677	ANKRD1	2.21549	6.07415e-18		ENSG00000179240	GVQW3	-2.35119	5.78387e-18
ENSG00000272114		2.19463	2.5387e-20		ENSG00000253537	PCDHGA7	-2.33881	0.00120617
ENSG00000108932	SLC16A6	2.19029	2.00333e-31		ENSG00000188385	JAKMIP3	-2.32434	0.000897296
ENSG00000224093	BCAR3-AS1	2.18511	3.09563e-26		ENSG00000278071		-2.31746	0.0380853
ENSG00000267607		2.17955	1.59953e-09		ENSG00000171428	NAT1	-2.31478	1.04342e-08
ENSG00000135604	STX11	2.1794	0.0028655		ENSG00000108984	MAP2K6	-2.30881	2.21238e-26
ENSG00000130203	APOE	2.16298	0.0470837		ENSG00000170293	CMTM8	-2.30218	0.0132316
ENSG00000139289	PHLDA1	2.14435	2.64498e-33		ENSG00000280077		-2.2956	1.45438e-05
ENSG00000137936	BCAR3	2.13329	2.24045e-65		ENSG00000101417	PXMP4	-2.29501	1.80665e-12
ENSG00000236255		2.13309	0.000196823		ENSG00000196689	TRPV1	-2.28451	0.0112114
ENSG00000027075	PRKCH	2.12349	3.45462e-08		ENSG00000215196	BASP1-AS1	-2.28159	3.08372e-10
ENSG00000078401	EDN1	2.12002	1.79838e-12		ENSG00000172296	SPTLC3	-2.27376	3.49442e-05
ENSG00000130589	HELZ2	2.1186	4.91865e-32		ENSG00000279048		-2.27375	0.030017
ENSG00000285999		2.11817	0.000335751		ENSG00000258711		-2.27138	1.49302e-11
ENSG00000227220		2.11727	4.43577e-24		ENSG00000174327	SLC16A13	-2.27017	9.86257e-05
ENSG00000145220	LYAR	2.10924	3.59745e-58		ENSG00000280120		-2.26668	0.0259199
ENSG00000173530	TNFRSF10D	2.09785	1.38705e-35		ENSG00000261204		-2.26662	0.00786366
ENSG00000123095	BHLHE41	2.095	0.0207156		ENSG00000221164	SNORA11F	-2.26609	0.0378094
ENSG00000284669		2.09441	0.00440097		ENSG00000231887	PRH1	-2.26419	0.0215389
ENSG00000124882	EREG	2.09267	1.38108e-07		ENSG00000224728	IMPDH1P8	-2.26105	0.0333411
ENSG00000181634	TNFSF15	2.0777	0.0196352		ENSG00000213057	C1orf220	-2.2603	0.0275884
ENSG00000023608	SNAPC1	2.07489	2.93538e-13		ENSG00000287321		-2.25846	0.0433296
ENSG00000128342	LIF	2.0628	3.62549e-36		ENSG00000286435		-2.25375	0.0413891
ENSG00000101384	JAG1	2.06213	2.19838e-16		ENSG00000166963	MAP1A	-2.24955	1.5289e-29
ENSG00000228086		2.05684	0.0446825		ENSG00000204390	HSPA1L	-2.24549	1.01868e-08
ENSG00000165449	SLC16A9	2.05078	1.06993e-05		ENSG00000261879	ZNF594-DT	-2.24355	0.00618107
ENSG00000206077	ZDHHC11B	2.04913	1.93122e-06		ENSG00000184908	CLCNKB	-2.24333	0.0453633
ENSG00000122861	PLAU	2.0479	8.57737e-06		ENSG00000277778	PGM5P2	-2.22313	0.000196239
ENSG00000104689	TNFRSF10A	2.0413	1.19493e-69		ENSG00000281332	LINC00997	-2.22274	0.00665201
ENSG00000185483	ROR1	2.03752	1.22114e-11		ENSG00000162391	FAM151A	-2.21957	0.0018835
ENSG00000228318		2.03668	2.62499e-06		ENSG00000279019		-2.21048	0.0183651
ENSG00000137801	THBS1	2.03315	7.25439e-48		ENSG00000183615	FAM167B	-2.20174	0.0219231
ENSG00000151014	NOCT	2.02938	8.41299e-20		ENSG00000261360	OTULIN-DT	-2.19207	0.00023943
ENSG00000163879	DNALI1	2.02718	0.0414886		ENSG00000160318	CLDND2	-2.17709	0.0434686
ENSG00000113319	RASGRF2	2.02244	0.000161419		ENSG00000247121		-2.17148	0.00249268
ENSG00000170049	KCNAB3	2.02044	0.0304332		ENSG00000286219	NOTCH2NLC	-2.16812	0.0376751
ENSG00000182308	DCAF4L1	2.01495	0.00109941		ENSG00000109705	NKX3-2	-2.16482	1.12791e-10
ENSG00000278763	FAM27B	2.01072	0.0116957		ENSG00000172935	MRGPRF	-2.16425	9.64066e-08
ENSG00000278621	THBS1-AS1	2.00696	1.6135e-18		ENSG00000139767	SRRM4	-2.14299	0.00336869
ENSG00000118523	CCN2	1.99857	1.78101e-23		ENSG00000146233	CYP39A1	-2.13516	0.0328097
ENSG00000240291		1.98612	0.0287411		ENSG00000235863	B3GALT4	-2.13466	0.0325884
ENSG00000114019	AMOTL2	1.98483	1.4475e-56		ENSG00000268879	IGFL1P1	-2.12505	2.84681e-10
ENSG00000058085	LAMC2	1.98013	0.00321389		ENSG00000255624	C10orf88B	-2.11864	0.00495122
ENSG00000157601	MX1	1.97294	2.30126e-24		ENSG00000288596	C8orf44	-2.11515	0.000280439
ENSG00000132003	ZSWIM4	1.96795	8.04072e-45		ENSG00000197557	TTC30A	-2.11318	1.27293e-09
ENSG00000099625	CBARP	1.96105	1.30002e-31		ENSG00000182836	PLCXD3	-2.10944	1.60361e-09
ENSG00000203875	SNHG5	1.95134	0.000280539		ENSG00000251432	LINC02615	-2.1083	0.000186404
ENSG00000118503	TNFAIP3	1.95043	2.45559e-48		ENSG00000225975	LINC01534	-2.10685	0.00064029
ENSG00000268812	LIF-AS2	1.94167	3.14017e-08		ENSG00000099953	MMP11	-2.10256	0.0141596
ENSG00000183018	SPNS2	1.94021	2.03741e-05		ENSG00000184481	FOXO4	-2.10224	5.40881e-12
ENSG00000120129	DUSP1	1.93515	3.8431e-90		ENSG00000259460		-2.09402	0.0232469
ENSG00000175197	DDIT3	1.93483	1.6121e-12		ENSG00000223658	C1GALT1C1L	-2.09224	0.010962
ENSG00000183386	FHL3	1.93225	6.24599e-48		ENSG00000188660	LINC00319	-2.08484	0.00190346
ENSG00000251131		1.92046	2.00286e-11		ENSG00000274460		-2.08435	0.0181501
ENSG00000270792		1.91895	3.84402e-07		ENSG00000245552		-2.08235	0.0404021
ENSG00000128016	ZFP36	1.91177	1.25574e-26		ENSG00000162997	PRORSD1P	-2.08165	0.0255304
ENSG00000257433	RPAP3-DT	1.91079	0.0333878		ENSG00000286128		-2.0791	0.00234694
ENSG00000109220	CHIC2	1.90856	3.34679e-15		ENSG00000158246	TENT5B	-2.07888	9.89175e-09
ENSG00000176387	HSD11B2	1.88405	0.00249226		ENSG00000277619		-2.07327	0.0234967
ENSG00000163347	CLDN1	1.87389	2.37297e-14		ENSG00000113721	PDGFRB	-2.05719	1.59432e-11
ENSG00000162733	DDR2	1.86454	0.0334429		ENSG00000246859	STARD4-AS1	-2.04022	2.9823e-27
ENSG00000184185	KCNJ12	1.8633	4.31381e-28		ENSG00000168772	CXXC4	-2.0273	0.0146428
ENSG00000287644		1.85793	0.000957571		ENSG00000189060	H1-0	-2.02529	1.84915e-59
ENSG00000257181		1.85038	4.83543e-16		ENSG00000254632		-2.01973	5.28524e-07
ENSG00000148400	NOTCH1	1.84647	4.53065e-63		ENSG00000277142	LINC00235	-2.01621	2.61465e-05
ENSG00000105499	PLA2G4C	1.83791	0.000785261		ENSG00000204389	HSPA1A	-2.01066	3.83357e-68
ENSG00000034152	MAP2K3	1.83531	3.84087e-34		ENSG00000267922		-1.99949	0.00015451
ENSG00000117525	F3	1.82507	4.40602e-34		ENSG00000169271	HSPB3	-1.99456	0.00995106
ENSG00000163659	TIPARP	1.81848	2.99151e-62		ENSG00000273373		-1.99429	1.06298e-05
ENSG00000079337	RAPGEF3	1.81795	2.32304e-10		ENSG00000148935	GAS2	-1.99203	0.000807485
ENSG00000113369	ARRDC3	1.81233	1.07434e-55		ENSG00000184602	SNN	-1.9898	1.62358e-30
ENSG00000197061	H4C3	1.80782	1.2674e-05		ENSG00000235703	LINC00894	-1.98123	0.00670713
ENSG00000145632	PLK2	1.80285	4.79973e-75		ENSG00000277117		-1.98073	0.0208074
ENSG00000267598		1.80123	9.25605e-86		ENSG00000185518	SV2B	-1.97732	0.000200631
ENSG00000111335	OAS2	1.79376	0.035014		ENSG00000196659	TTC30B	-1.97447	7.13665e-05
ENSG00000139926	FRMD6	1.79364	2.33119e-29		ENSG00000123342	MMP19	-1.97378	0.0459611
ENSG00000162458	FBLIM1	1.78483	2.3196e-22		ENSG00000258766	DIO2-AS1	-1.96842	0.00507605
ENSG00000120889	TNFRSF10B	1.78465	2.04547e-82		ENSG00000247746	USP51	-1.96506	0.0161374
ENSG00000265840		1.78437	9.64145e-13		ENSG00000214439	FAM185BP	-1.9645	0.0291238
ENSG00000148339	SLC25A25	1.7763	1.18404e-71		ENSG00000204659	CBY3	-1.9623	0.0266609
ENSG00000277496		1.77322	1.95743e-05		ENSG00000246174	KCTD21-AS1	-1.95848	1.82538e-12
ENSG00000132510	KDM6B	1.76844	1.91853e-28		ENSG00000261652	C15orf65	-1.95793	0.00456033
ENSG00000160888	IER2	1.76114	1.32396e-106		ENSG00000224854	CDKN2A-DT	-1.95376	0.0236368
ENSG00000112715	VEGFA	1.75345	7.50858e-61		ENSG00000236242	MYO16-AS1	-1.95131	0.00435481
ENSG00000164949	GEM	1.75191	5.34796e-21		ENSG00000102385	DRP2	-1.95119	0.00702696
ENSG00000115271	GCA	1.74217	0.0418711		ENSG00000243335	KCTD7	-1.9473	4.30981e-22
ENSG00000186523	FAM86B1	1.74064	0.0022758		ENSG00000165028	NIPSNAP3B	-1.94425	0.0140416
ENSG00000247081	BAALC-AS1	1.73812	0.0136091		ENSG00000184949	FAM227A	-1.94411	1.45107e-07
ENSG00000020633	RUNX3	1.73496	7.11754e-44		ENSG00000259664	LINC02254	-1.94313	0.00296693
ENSG00000132326	PER2	1.73198	7.07082e-13		ENSG00000275180		-1.94231	5.00487e-10
ENSG00000163874	ZC3H12A	1.7313	9.79802e-34		ENSG00000170703	TTLL6	-1.93903	0.000122563
ENSG00000135679	MDM2	1.72689	2.56714e-39		ENSG00000126945	HNRNPH2	-1.93096	1.20748e-69
ENSG00000143367	TUFT1	1.72335	1.97778e-37		ENSG00000179772	FOXS1	-1.92763	0.0238286
ENSG00000164610	RP9	1.72159	3.98469e-15		ENSG00000273162		-1.92732	0.00155792
ENSG00000186654	PRR5	1.72095	0.000176994		ENSG00000223764	LINC02593	-1.92094	3.45222e-15
ENSG00000135407	AVIL	1.71888	0.000585828		ENSG00000236358		-1.91968	0.0385006
ENSG00000114315	HES1	1.71463	9.30207e-11		ENSG00000143494	VASH2	-1.91789	0.000109273
ENSG00000183486	MX2	1.7134	0.0260038		ENSG00000228175	GEMIN8P4	-1.91681	0.0479311
ENSG00000142871	CCN1	1.71336	4.50072e-17		ENSG00000176714	CCDC121	-1.91632	0.00163904
ENSG00000175556	LONRF3	1.70813	2.87237e-26		ENSG00000176396	EID2	-1.90506	1.18309e-16
ENSG00000244313		1.70168	0.00112489		ENSG00000124839	RAB17	-1.89815	0.0416969
ENSG00000124171	PARD6B	1.69886	0.000265286		ENSG00000204060	FOXO6	-1.89756	0.000406615
ENSG00000170684	ZNF296	1.69593	1.60761e-08		ENSG00000219607	PPP1R3G	-1.89646	0.00453335
ENSG00000198355	PIM3	1.68476	2.18155e-54		ENSG00000142065	ZFP14	-1.88469	0.00361362
ENSG00000272933	TRIM8-DT	1.6748	0.000887992		ENSG00000231419	LINC00689	-1.88093	5.95767e-07
ENSG00000148926	ADM	1.67096	3.62348e-43		ENSG00000268583		-1.87591	0.044564
ENSG00000100918	REC8	1.67018	0.00621412		ENSG00000260630	SNAI3-AS1	-1.87544	0.00122454
ENSG00000176531	PHLDB3	1.66082	3.10228e-14		ENSG00000163508	EOMES	-1.87383	0.015748
ENSG00000171223	JUNB	1.65767	4.61546e-181		ENSG00000142235	LMTK3	-1.8704	0.000419162
ENSG00000073756	PTGS2	1.65592	4.13304e-13		ENSG00000287261		-1.86929	0.0390299
ENSG00000251034		1.65067	0.00504951		ENSG00000272462		-1.86688	0.00275171
ENSG00000106366	SERPINE1	1.64472	1.78998e-20		ENSG00000226137	BAIAP2-DT	-1.85893	2.11535e-15
ENSG00000107338	SHB	1.6358	1.35991e-22		ENSG00000168646	AXIN2	-1.8558	1.77279e-06
ENSG00000161921	CXCL16	1.63087	0.000153186		ENSG00000250846	EPHA5-AS1	-1.85274	0.0462503
ENSG00000145147	SLIT2	1.62887	5.32524e-07		ENSG00000169359	SLC33A1	-1.84858	1.61393e-06
ENSG00000149948	HMGA2	1.62676	7.51358e-05		ENSG00000254618	TMED10P1	-1.84559	0.0451694
ENSG00000150667	FSIP1	1.61308	1.17948e-16		ENSG00000119686	FLVCR2	-1.8413	1.82563e-08
ENSG00000159388	BTG2	1.60528	9.07519e-14		ENSG00000175175	PPM1E	-1.84076	0.0102921
ENSG00000177076	ACER2	1.6036	0.00338982		ENSG00000234648		-1.82894	0.0379597
ENSG00000164236	ANKRD33B	1.60357	1.62884e-20		ENSG00000204529	GUCY2EP	-1.82548	0.00102312
ENSG00000188818	ZDHHC11	1.60308	0.00346189		ENSG00000215267	AKR1C7P	-1.82493	0.039093
ENSG00000142528	ZNF473	1.59935	5.43749e-22		ENSG00000188021	UBQLN2	-1.82425	2.30729e-56
ENSG00000108691	CCL2	1.59837	0.00949663		ENSG00000137843	PAK6	-1.82287	0.0385131
ENSG00000204524	ZNF805	1.59822	1.35427e-10		ENSG00000175643	RMI2	-1.81657	6.444e-11
ENSG00000121068	TBX2	1.59446	0.00161995		ENSG00000220785	MTMR9LP	-1.81471	4.81055e-05
ENSG00000244405	ETV5	1.59429	5.79712e-05		ENSG00000287126		-1.81463	0.000822247
ENSG00000076604	TRAF4	1.579	6.13901e-83		ENSG00000132718	SYT11	-1.81285	3.10311e-05
ENSG00000240053	LY6G5B	1.57529	0.00850891		ENSG00000142677	IL22RA1	-1.81254	0.00360345
ENSG00000172183	ISG20	1.57455	8.53863e-08		ENSG00000156970	BUB1B	-1.81243	4.59783e-50
ENSG00000101333	PLCB4	1.57354	2.68428e-16		ENSG00000165389	SPTSSA	-1.81175	1.03211e-33
ENSG00000115641	FHL2	1.57333	3.13405e-73		ENSG00000271533		-1.81023	0.0067862
ENSG00000268896		1.57295	0.0462328		ENSG00000154188	ANGPT1	-1.80801	1.26512e-05
ENSG00000108352	RAPGEFL1	1.57287	0.00733183		ENSG00000272004		-1.80738	0.000113848
ENSG00000129951	PLPPR3	1.56414	0.0228498		ENSG00000187189	TSPYL4	-1.80376	2.73549e-33
ENSG00000143842	SOX13	1.56396	8.07139e-30		ENSG00000130600	H19	-1.8012	0.000493154
ENSG00000171522	PTGER4	1.56349	2.4679e-09		ENSG00000275131	PDE4DIPP2	-1.79364	2.21966e-05
ENSG00000112182	BACH2	1.56317	0.00762179		ENSG00000223646		-1.78301	0.038563
ENSG00000174564	IL20RB	1.55987	0.000401554		ENSG00000159184	HOXB13	-1.78104	2.08978e-05
ENSG00000055483	USP36	1.55974	3.76548e-114		ENSG00000188997	KCTD21	-1.77884	2.30451e-14
ENSG00000280020		1.5588	0.0120702		ENSG00000231104		-1.77865	0.0214222
ENSG00000048052	HDAC9	1.55775	0.0338332		ENSG00000263513	FAM72C	-1.77773	0.0428046
ENSG00000163235	TGFA	1.55579	0.00267258		ENSG00000238113	LINC01410	-1.77097	2.09077e-06
ENSG00000225864		1.54537	0.00556691		ENSG00000227051	C14orf132	-1.7678	0.0102839
ENSG00000272419	LINC01145	1.54154	0.000132895		ENSG00000288722	F8A1	-1.76502	0.00066761
ENSG00000155090	KLF10	1.5335	2.23516e-57		ENSG00000157796	WDR19	-1.75214	9.66402e-21
ENSG00000278918		1.52713	1.66698e-06		ENSG00000237976	RFX5-AS1	-1.7514	0.0297354
ENSG00000242689	CNTF	1.52231	0.00356376		ENSG00000206417	H1-10-AS1	-1.74635	1.64788e-25
ENSG00000188215	DCUN1D3	1.52098	5.2103e-11		ENSG00000237523	LINC00857	-1.74113	4.08017e-06
ENSG00000025708	TYMP	1.52065	5.27183e-14		ENSG00000157570	TSPAN18	-1.74091	5.22275e-13
ENSG00000164308	ERAP2	1.5204	0.00194007		ENSG00000215790	SLC35E2A	-1.73664	8.42209e-06
ENSG00000170542	SERPINB9	1.51579	0.0011016		ENSG00000155254	MARVELD1	-1.73519	1.06697e-43
ENSG00000189410	SH2D5	1.51411	2.14157e-13		ENSG00000254837		-1.73401	0.000346195
ENSG00000182585	EPGN	1.51114	0.000654756		ENSG00000138413	IDH1	-1.73156	3.45474e-50
ENSG00000162734	PEA15	1.50936	2.6288e-65		ENSG00000213694	S1PR3	-1.73153	3.73933e-41
ENSG00000148377	IDI2	1.50765	0.0288799		ENSG00000251209	LINC00923	-1.73015	1.11783e-11
ENSG00000078081	LAMP3	1.50555	0.0422573		ENSG00000186564	FOXD2	-1.72828	0.0204045
ENSG00000265474		1.49774	3.31414e-15		ENSG00000083067	TRPM3	-1.7215	0.01415
ENSG00000126249	PDCD2L	1.49683	0.000124049		ENSG00000257831		-1.72042	1.11425e-05
ENSG00000249898	MCPH1-AS1	1.48968	0.00724836		ENSG00000092758	COL9A3	-1.71256	0.00512621
ENSG00000095951	HIVEP1	1.48468	1.27367e-20		ENSG00000245614	DDX11-AS1	-1.70851	0.0256885
ENSG00000100906	NFKBIA	1.48401	3.87393e-21		ENSG00000163328	GPR155	-1.70848	0.000137859
ENSG00000113739	STC2	1.48021	5.05379e-53		ENSG00000278828	H3C10	-1.70318	0.0206601
ENSG00000196408	NOXO1	1.48009	1.01167e-05		ENSG00000162512	SDC3	-1.69792	7.72467e-10
ENSG00000181026	AEN	1.47871	6.05686e-46		ENSG00000138669	PRKG2	-1.69662	0.0148571
ENSG00000171132	PRKCE	1.478	6.4259e-11		ENSG00000250615		-1.68777	4.99042e-05
ENSG00000070423	RNF126	1.47616	1.35956e-79		ENSG00000119699	TGFB3	-1.68697	0.000215036
ENSG00000280273		1.47028	0.000361652		ENSG00000278390		-1.68668	0.0166263
ENSG00000125347	IRF1	1.46807	7.73351e-19		ENSG00000247199	FBXO38-DT	-1.68606	9.59918e-22
ENSG00000249375	CASC11	1.46777	1.09652e-42		ENSG00000006283	CACNA1G	-1.68413	0.0147865
ENSG00000196428	TSC22D2	1.46467	1.10734e-23		ENSG00000223768	LINC00205	-1.68222	1.71159e-23
ENSG00000168826	ZBTB49	1.46328	2.43819e-06		ENSG00000178700	DHFR2	-1.68163	0.000116668
ENSG00000157168	NRG1	1.46037	1.97511e-06		ENSG00000230615		-1.68126	0.00215967
ENSG00000141682	PMAIP1	1.45667	1.25376e-20		ENSG00000279091		-1.68072	0.0167733
ENSG00000178127	NDUFV2	1.45641	0.0224112		ENSG00000174586	ZNF497	-1.68007	0.00127324
ENSG00000162552	WNT4	1.44821	0.0452289		ENSG00000198468	FLVCR1-DT	-1.67598	5.61392e-05
ENSG00000147799	ARHGAP39	1.44645	2.74128e-19		ENSG00000183199	HSP90AB3P	-1.67305	0.0325901
ENSG00000184557	SOCS3	1.43474	8.47999e-35		ENSG00000227946		-1.67113	0.0140416
ENSG00000162775	RBM15	1.43368	1.46293e-30		ENSG00000255874	PRECSIT	-1.66998	5.28565e-26
ENSG00000250714		1.42829	0.0217981		ENSG00000170915	PAQR8	-1.66884	0.00617019
ENSG00000260428	SCX	1.42703	0.0338685		ENSG00000206530	CFAP44	-1.66851	5.09699e-08
ENSG00000156150	ALX3	1.42665	0.0213679		ENSG00000166407	LMO1	-1.66803	1.88628e-11
ENSG00000136997	MYC	1.42516	2.77547e-89		ENSG00000260285		-1.66737	0.00287339
ENSG00000279333		1.42361	9.24623e-10		ENSG00000256712		-1.66625	1.45903e-05
ENSG00000197961	ZNF121	1.41871	3.22306e-19		ENSG00000272501		-1.66143	0.027889
ENSG00000253930	TNFRSF10A-AS1	1.41751	0.000250594		ENSG00000138767	CNOT6L	-1.65387	1.82463e-08
ENSG00000136826	KLF4	1.41346	2.08686e-52		ENSG00000211448	DIO2	-1.65211	3.55205e-30
ENSG00000148154	UGCG	1.41103	1.02533e-17		ENSG00000272398	CD24	-1.65083	5.75952e-68
ENSG00000119508	NR4A3	1.41026	5.81785e-20		ENSG00000250208	FZD10-AS1	-1.64992	2.1913e-13
ENSG00000109670	FBXW7	1.40413	4.17608e-14		ENSG00000168071	CCDC88B	-1.64033	8.32001e-07
ENSG00000011422	PLAUR	1.40252	2.15879e-25		ENSG00000167549	CORO6	-1.63703	2.39658e-05
ENSG00000059378	PARP12	1.39888	1.10901e-10		ENSG00000184897	H1-10	-1.6343	1.44146e-45
ENSG00000143473	KCNH1	1.39676	4.25972e-16		ENSG00000126787	DLGAP5	-1.63057	1.49242e-25
ENSG00000134363	FST	1.39568	0.000177684		ENSG00000067601	PMS2P4	-1.62888	0.0316924
ENSG00000171206	TRIM8	1.39035	9.38904e-21		ENSG00000287104		-1.62571	0.0146273
ENSG00000149289	ZC3H12C	1.38816	1.05052e-11		ENSG00000214357	NEURL1B	-1.62096	7.12822e-38
ENSG00000105085	MED26	1.38792	2.37876e-09		ENSG00000204388	HSPA1B	-1.6202	5.73801e-15
ENSG00000117245	KIF17	1.38301	2.06472e-05		ENSG00000121486	TRMT1L	-1.61922	3.98395e-17
ENSG00000142279	WTIP	1.38115	3.95408e-09		ENSG00000185670	ZBTB3	-1.61915	0.000860911
ENSG00000115598	IL1RL2	1.37958	0.00871521		ENSG00000171103	TRMT61B	-1.61822	7.62773e-11
ENSG00000168564	CDKN2AIP	1.37868	4.49323e-17		ENSG00000215808	LINC01139	-1.61631	7.7454e-05
ENSG00000227741		1.37644	2.1654e-27		ENSG00000180340	FZD2	-1.61446	2.60425e-19
ENSG00000228919		1.37229	4.09027e-05		ENSG00000231290	APCDD1L-DT	-1.6079	1.80691e-09
ENSG00000104825	NFKBIB	1.37004	4.23988e-20		ENSG00000173456	RNF26	-1.60774	9.93032e-48
ENSG00000154781	CCDC174	1.36853	6.57021e-17		ENSG00000075826	SEC31B	-1.60549	0.0113252
ENSG00000197857	ZNF44	1.36845	1.22714e-07		ENSG00000272631		-1.60267	0.00559864
ENSG00000112561	TFEB	1.36833	4.86444e-19		ENSG00000010318	PHF7	-1.60252	0.000419773
ENSG00000163814	CDCP1	1.36577	6.00618e-24		ENSG00000237172	B3GNT9	-1.60058	1.28393e-19
ENSG00000125753	VASP	1.36544	8.40841e-68		ENSG00000105711	SCN1B	-1.59968	0.00248045
ENSG00000074590	NUAK1	1.36383	4.76279e-36		ENSG00000135241	PNPLA8	-1.59704	6.88854e-24
ENSG00000175471	MCTP1	1.3625	7.61347e-12		ENSG00000160298	C21orf58	-1.59093	3.47385e-16
ENSG00000151151	IPMK	1.36232	3.68452e-11		ENSG00000129493	HEATR5A	-1.5893	1.86204e-37
ENSG00000287377		1.35971	6.03246e-06		ENSG00000163807	KIAA1143	-1.58711	1.71819e-31
ENSG00000275342	PRAG1	1.35383	5.95736e-28		ENSG00000176399	DMRTA1	-1.58655	2.20507e-08
ENSG00000196449	YRDC	1.3505	6.02366e-37		ENSG00000283703	VSIG10L2	-1.58576	0.0262221
ENSG00000246582	TNFRSF10A-DT	1.34798	3.24525e-08		ENSG00000225828	FAM229A	-1.5853	0.000319127
ENSG00000111252	SH2B3	1.3476	4.05585e-05		ENSG00000135722	FBXL8	-1.58317	0.000897957
ENSG00000100532	CGRRF1	1.34754	5.17477e-05		ENSG00000225880	LINC00115	-1.5825	0.0038641
ENSG00000213337	ANKRD39	1.34626	0.00382692		ENSG00000115446	UNC50	-1.58244	7.15321e-16
ENSG00000008513	ST3GAL1	1.3436	9.23379e-50		ENSG00000123080	CDKN2C	-1.57986	4.43796e-61
ENSG00000141448	GATA6	1.34207	7.40079e-07		ENSG00000164040	PGRMC2	-1.57524	1.04026e-76
ENSG00000250906		1.3386	0.0491235		ENSG00000131089	ARHGEF9	-1.57438	3.20165e-06
ENSG00000146904	EPHA1	1.33821	1.53495e-19		ENSG00000179029	TMEM107	-1.57037	9.59218e-08
ENSG00000180667	YOD1	1.33804	7.18176e-16		ENSG00000273297		-1.56912	0.0159119
ENSG00000115267	IFIH1	1.33735	0.000342818		ENSG00000253445		-1.56726	0.000217591
ENSG00000170836	PPM1D	1.33683	3.06543e-16		ENSG00000151882	CCL28	-1.56644	0.00165936
ENSG00000128283	CDC42EP1	1.33533	4.7561e-34		ENSG00000132357	CARD6	-1.56625	2.09143e-11
ENSG00000278616	BEND3P3	1.33403	0.010549		ENSG00000253846	PCDHGA10	-1.56516	0.0460971
ENSG00000163297	ANTXR2	1.33301	0.00336161		ENSG00000176401	EID2B	-1.56271	8.06544e-05
ENSG00000099860	GADD45B	1.33124	4.6767e-20		ENSG00000162526	TSSK3	-1.56258	0.00914453
ENSG00000185753	CXorf38	1.33071	6.59546e-10		ENSG00000146021	KLHL3	-1.55539	0.0113694
ENSG00000205903	ZNF316	1.33066	2.26666e-54		ENSG00000285077	ARHGAP11B	-1.55082	0.00257872
ENSG00000168993	CPLX1	1.32802	0.0173678		ENSG00000232656	IDI2-AS1	-1.54572	3.37115e-12
ENSG00000253540	FAM86HP	1.32661	0.0453161		ENSG00000178096	BOLA1	-1.54369	0.000211636
ENSG00000171612	SLC25A33	1.32391	1.64845e-18		ENSG00000239718	HLTF-AS1	-1.54302	0.000321228
ENSG00000241322	CDRT1	1.32268	5.21747e-05		ENSG00000175874	CREG2	-1.54295	6.46874e-18
ENSG00000213398	LCAT	1.31693	0.00623034		ENSG00000196366	C9orf163	-1.54101	4.02062e-05
ENSG00000109320	NFKB1	1.31587	3.47176e-33		ENSG00000198496	NBR2	-1.53922	0.00116151
ENSG00000130766	SESN2	1.31568	2.26646e-12		ENSG00000092964	DPYSL2	-1.53817	2.44095e-43
ENSG00000152503	TRIM36	1.3154	0.00496915		ENSG00000133858	ZFC3H1	-1.53627	4.53099e-25
ENSG00000170525	PFKFB3	1.3152	2.28889e-37		ENSG00000128694	OSGEPL1	-1.53529	2.05365e-07
ENSG00000198952	SMG5	1.30468	4.44273e-57		ENSG00000216775		-1.53502	0.000577139
ENSG00000111331	OAS3	1.304	9.58667e-14		ENSG00000102384	CENPI	-1.53488	1.12982e-20
ENSG00000166886	NAB2	1.30097	7.46046e-38		ENSG00000187796	CARD9	-1.53319	0.0413736
ENSG00000145287	PLAC8	1.30065	0.0186392		ENSG00000164294	GPX8	-1.53202	1.44655e-53
ENSG00000120910	PPP3CC	1.29984	2.07231e-19		ENSG00000142166	IFNAR1	-1.52798	3.00274e-26
ENSG00000148841	ITPRIP	1.29873	3.1439e-60		ENSG00000147852	VLDLR	-1.52513	4.42703e-06
ENSG00000124784	RIOK1	1.29858	4.15775e-20		ENSG00000278922		-1.52382	1.88811e-05
ENSG00000134758	RNF138	1.29847	2.36759e-11		ENSG00000187372	PCDHB13	-1.52334	0.016424
ENSG00000129353	SLC44A2	1.29769	3.69299e-42		ENSG00000245571	FAM111A-DT	-1.52272	0.0124113
ENSG00000055044	NOP58	1.29589	2.29403e-75		ENSG00000174684	B4GAT1	-1.52266	7.09806e-12
ENSG00000167994	RAB3IL1	1.29551	1.86377e-23		ENSG00000265489	ARHGAP44-AS1	-1.52144	5.92087e-05
ENSG00000102908	NFAT5	1.29471	9.2228e-12		ENSG00000052802	MSMO1	-1.51397	4.61163e-19
ENSG00000176170	SPHK1	1.29432	6.69359e-63		ENSG00000185495	SEPTIN7P13	-1.50787	0.0180301
ENSG00000117226	GBP3	1.28987	0.000489449		ENSG00000145536	ADAMTS16	-1.50769	0.0154327
ENSG00000178229	ZNF543	1.28867	0.000271211		ENSG00000155868	MED7	-1.50607	3.07411e-05
ENSG00000105559	PLEKHA4	1.2879	0.00658523		ENSG00000276710	CSPG4P10	-1.506	3.22995e-10
ENSG00000167703	SLC43A2	1.28543	2.45627e-09		ENSG00000279759		-1.50572	0.0278453
ENSG00000010818	HIVEP2	1.28451	1.73496e-14		ENSG00000064309	CDON	-1.50551	9.08569e-15
ENSG00000154822	PLCL2	1.28342	2.21228e-09		ENSG00000139190	VAMP1	-1.5052	4.89614e-13
ENSG00000156232	WHAMM	1.28091	1.70449e-08		ENSG00000175548	ALG10B	-1.50502	1.66097e-12
ENSG00000162852	CNST	1.27944	7.5637e-14		ENSG00000143409	MINDY1	-1.50225	6.77121e-08
ENSG00000097096	SYDE2	1.27849	3.05462e-05		ENSG00000161664	ASB16	-1.50044	0.00316286
ENSG00000127191	TRAF2	1.27693	8.41441e-45		ENSG00000273018	FAM106A	-1.5	0.00254786
ENSG00000141384	TAF4B	1.26946	2.22657e-05		ENSG00000180964	TCEAL8	-1.49778	1.19177e-12
ENSG00000053524	MCF2L2	1.2694	0.0287131		ENSG00000247400	DNAJC3-DT	-1.49527	0.00580572
ENSG00000186432	KPNA4	1.26631	4.50498e-40		ENSG00000138380	CARF	-1.49457	0.000674176
ENSG00000131759	RARA	1.26422	3.60882e-14		ENSG00000103494	RPGRIP1L	-1.49344	1.12959e-13
ENSG00000197050	ZNF420	1.26361	4.2389e-05		ENSG00000142102	PGGHG	-1.49283	0.00028796
ENSG00000175832	ETV4	1.25563	4.95535e-07		ENSG00000116761	CTH	-1.49231	3.9411e-07
ENSG00000133398	MED10	1.25504	4.19442e-44		ENSG00000271576	PRKACB-DT	-1.49194	0.0481193
ENSG00000110092	CCND1	1.25301	1.93014e-35		ENSG00000180573	H2AC6	-1.4896	6.69074e-09
ENSG00000179094	PER1	1.25122	7.85478e-26		ENSG00000114796	KLHL24	-1.48893	2.54938e-08
ENSG00000131378	RFTN1	1.25059	1.80312e-21		ENSG00000111653	ING4	-1.48866	5.10578e-11
ENSG00000184381	PLA2G6	1.24856	0.000111094		ENSG00000160233	LRRC3	-1.48466	0.0189013
ENSG00000176692	FOXC2	1.24591	7.92384e-18		ENSG00000120832	MTERF2	-1.48435	3.60988e-08
ENSG00000269091		1.24424	0.00199322		ENSG00000168612	ZSWIM1	-1.48335	1.96866e-10
ENSG00000179862	CITED4	1.24389	0.00953932		ENSG00000108813	DLX4	-1.48092	0.0266561
ENSG00000198382	UVRAG	1.24354	4.80164e-21		ENSG00000119640	ACYP1	-1.48059	4.28683e-08
ENSG00000119900	OGFRL1	1.24324	1.98564e-18		ENSG00000236104	ZBTB22	-1.4793	1.07673e-07
ENSG00000143217	NECTIN4	1.23887	0.00689482		ENSG00000258620		-1.47669	0.00933273
ENSG00000116285	ERRFI1	1.23883	1.32744e-19		ENSG00000128266	GNAZ	-1.47514	0.000642374
ENSG00000260944	FOXC2-AS1	1.23495	0.000252038		ENSG00000177169	ULK1	-1.47241	5.63616e-39
ENSG00000138696	BMPR1B	1.23422	0.000167718		ENSG00000170175	CHRNB1	-1.46959	0.0196524
ENSG00000286223		1.23346	4.14261e-11		ENSG00000250240		-1.4695	1.01473e-14
ENSG00000196110	ZNF699	1.22955	0.0067024		ENSG00000227775		-1.46773	2.61949e-06
ENSG00000184371	CSF1	1.22859	1.85069e-11		ENSG00000258345		-1.4671	0.0192546
ENSG00000167962	ZNF598	1.22798	4.55739e-42		ENSG00000145242	EPHA5	-1.46709	0.000241064
ENSG00000100664	EIF5	1.22769	2.35424e-52		ENSG00000268575		-1.46647	0.0313553
ENSG00000229780	UBE2Q1-AS1	1.22135	3.98469e-15		ENSG00000175536	LIPT2	-1.46538	0.0172637
ENSG00000019549	SNAI2	1.22045	9.09537e-13		ENSG00000254685	FPGT	-1.46475	5.33925e-06
ENSG00000116514	RNF19B	1.2178	3.16854e-21		ENSG00000175130	MARCKSL1	-1.46332	4.41206e-35
ENSG00000151689	INPP1	1.21635	5.23128e-13		ENSG00000154079	SDHAF4	-1.46302	0.00769612
ENSG00000134627	PIWIL4	1.21245	0.00241226		ENSG00000260032	NORAD	-1.4625	4.37855e-96
ENSG00000059804	SLC2A3	1.21238	5.4718e-15		ENSG00000205138	SDHAF1	-1.46244	1.34409e-08
ENSG00000116117	PARD3B	1.21236	7.72662e-13		ENSG00000172465	TCEAL1	-1.46116	7.08024e-11
ENSG00000159840	ZYX	1.20677	2.27568e-46		ENSG00000231880		-1.46039	6.15967e-10
ENSG00000185947	ZNF267	1.2053	3.01507e-05		ENSG00000275765		-1.46037	0.0430652
ENSG00000250234		1.20386	6.97044e-09		ENSG00000287267		-1.46009	0.0298725
ENSG00000280355		1.20318	0.0166731		ENSG00000132938	MTUS2	-1.45783	0.000112772
ENSG00000270075		1.20043	6.84302e-16		ENSG00000286966		-1.45672	0.0255304
ENSG00000174718	RESF1	1.19925	7.39049e-07		ENSG00000267317		-1.45629	0.000718994
ENSG00000187185		1.19894	1.07525e-14		ENSG00000115896	PLCL1	-1.4555	6.15456e-05
ENSG00000223820	CFL1P1	1.19815	0.00251477		ENSG00000276291	FRG1HP	-1.4555	1.2777e-08
ENSG00000111696	NT5DC3	1.19679	1.03462e-08		ENSG00000164850	GPER1	-1.45405	0.0269407
ENSG00000254762	KLC2-AS2	1.19482	0.0286386		ENSG00000118690	ARMC2	-1.45343	0.0276533
ENSG00000204267	TAP2	1.18962	6.45412e-09		ENSG00000131061	ZNF341	-1.45002	9.24384e-05
ENSG00000124782	RREB1	1.18893	5.91202e-18		ENSG00000087258	GNAO1	-1.44998	0.00127216
ENSG00000187605	TET3	1.18858	6.22837e-24		ENSG00000204019	CT83	-1.44825	7.62898e-06
ENSG00000113356	POLR3G	1.18823	1.45476e-09		ENSG00000173110	HSPA6	-1.44471	0.00155492
ENSG00000026103	FAS	1.18635	4.33783e-07		ENSG00000185946	RNPC3	-1.43923	1.38635e-08
ENSG00000047597	XK	1.18221	0.000826361		ENSG00000133111	RFXAP	-1.43878	0.000301645
ENSG00000171608	PIK3CD	1.18155	0.0065641		ENSG00000090238	YPEL3	-1.43787	0.00642659
ENSG00000146587	RBAK	1.17956	3.87108e-11		ENSG00000266933	MADCAM1-AS1	-1.43567	1.97717e-09
ENSG00000167470	MIDN	1.17895	6.60543e-37		ENSG00000259468		-1.43488	0.0392736
ENSG00000030110	BAK1	1.17784	1.04132e-27		ENSG00000198554	WDHD1	-1.43481	1.29278e-28
ENSG00000225648	SBDSP1	1.17327	1.10887e-18		ENSG00000236499	LINC00896	-1.43367	0.000530714
ENSG00000110218	PANX1	1.17253	6.94708e-17		ENSG00000213062		-1.43338	0.0425784
ENSG00000104228	TRIM35	1.17232	9.80021e-15		ENSG00000257354	MIRLET7IHG	-1.4292	0.00265904
ENSG00000107937	GTPBP4	1.16883	7.78777e-70		ENSG00000151150	ANK3	-1.42555	0.00404619
ENSG00000127124	HIVEP3	1.16865	0.000718625		ENSG00000229018	PMS2P7	-1.42527	4.99748e-12
ENSG00000241839	PLEKHO2	1.16512	7.9253e-05		ENSG00000276122		-1.42465	0.0275372
ENSG00000047579	DTNBP1	1.16464	1.50636e-09		ENSG00000228630	HOTAIR	-1.42342	0.000402779
ENSG00000185453	ZSWIM9	1.16354	8.33128e-22		ENSG00000008277	ADAM22	-1.42256	6.4334e-07
ENSG00000136527	TRA2B	1.16079	1.40112e-88		ENSG00000137440	FGFBP1	-1.41706	0.0409866
ENSG00000110330	BIRC2	1.16028	6.58469e-12		ENSG00000224577	LINC01117	-1.41539	0.0348178
ENSG00000125731	SH2D3A	1.15996	2.51901e-09		ENSG00000146278	PNRC1	-1.41343	1.66982e-12
ENSG00000136048	DRAM1	1.15985	5.90622e-22		ENSG00000155666	KDM8	-1.41236	6.18802e-05
ENSG00000198039	ZNF273	1.15938	0.0285419		ENSG00000214510	SPINK13	-1.41212	3.15451e-12
ENSG00000164463	CREBRF	1.15922	0.000232644		ENSG00000104313	EYA1	-1.41192	0.00424778
ENSG00000205571	SMN2	1.1576	4.63455e-07		ENSG00000168490	PHYHIP	-1.41154	0.0405262
ENSG00000164951	PDP1	1.15634	3.81364e-16		ENSG00000164291	ARSK	-1.41041	1.32169e-13
ENSG00000105963	ADAP1	1.15561	0.0169639		ENSG00000205978	NYNRIN	-1.40773	9.76846e-08
ENSG00000172062	SMN1	1.15516	1.3607e-09		ENSG00000081803	CADPS2	-1.40702	0.0329025
ENSG00000132664	POLR3F	1.15441	1.43121e-05		ENSG00000101115	SALL4	-1.40292	1.65551e-08
ENSG00000175105	ZNF654	1.15279	3.1927e-06		ENSG00000132256	TRIM5	-1.40174	2.97943e-09
ENSG00000162714	ZNF496	1.15255	9.08063e-27		ENSG00000287697		-1.40172	0.0212173
ENSG00000151414	NEK7	1.15119	2.02401e-18		ENSG00000287737		-1.40092	0.0491648
ENSG00000168394	TAP1	1.15089	4.04392e-17		ENSG00000203965	EFCAB7	-1.40073	1.93876e-06
ENSG00000165046	LETM2	1.15	0.00296218		ENSG00000067064	IDI1	-1.40011	5.30949e-26
ENSG00000056097	ZFR	1.14972	1.11063e-58		ENSG00000012822	CALCOCO1	-1.3975	9.7776e-19
ENSG00000226890		1.14816	0.00368803		ENSG00000196196	HRCT1	-1.39707	1.78735e-06
ENSG00000196152	ZNF79	1.14616	1.24606e-09		ENSG00000161048	NAPEPLD	-1.39595	2.70103e-05
ENSG00000231007	CDC20P1	1.14444	0.000773664		ENSG00000263753	LINC00667	-1.39536	2.05668e-12
ENSG00000170961	HAS2	1.14417	0.000143309		ENSG00000144395	CCDC150	-1.39459	1.18812e-06
ENSG00000124813	RUNX2	1.14413	0.0116084		ENSG00000163346	PBXIP1	-1.39401	7.90535e-17
ENSG00000177842	ZNF620	1.14382	0.000318966		ENSG00000213463	SYNJ2BP	-1.39245	1.02855e-17
ENSG00000105321	CCDC9	1.14129	1.74904e-28		ENSG00000175283	DOLK	-1.39237	1.20206e-19
ENSG00000121406	ZNF549	1.14028	0.00748368		ENSG00000228223	HCG11	-1.39214	1.929e-13
ENSG00000167721	TSR1	1.14009	2.28717e-79		ENSG00000133067	LGR6	-1.39166	5.31644e-09
ENSG00000139800	ZIC5	1.1394	2.59715e-07		ENSG00000245385		-1.39012	2.85366e-07
ENSG00000169991	IFFO2	1.13903	4.09051e-10		ENSG00000183762	KREMEN1	-1.38904	0.00513411
ENSG00000107864	CPEB3	1.1379	0.0113848		ENSG00000147041	SYTL5	-1.38778	0.00829721
ENSG00000134470	IL15RA	1.13711	9.78086e-05		ENSG00000149212	SESN3	-1.38697	1.1052e-10
ENSG00000113742	CPEB4	1.13698	3.25744e-23		ENSG00000146802	TMEM168	-1.38694	1.84022e-12
ENSG00000198298	ZNF485	1.13577	0.00432669		ENSG00000135211	TMEM60	-1.38679	5.24709e-07
ENSG00000067221	STOML1	1.13562	2.2408e-07		ENSG00000166428	PLD4	-1.3857	9.6567e-10
ENSG00000167720	SRR	1.13485	5.60036e-28		ENSG00000172687	ZNF738	-1.38529	2.70174e-05
ENSG00000177125	ZBTB34	1.13457	4.79198e-14		ENSG00000184486	POU3F2	-1.38362	0.00255652
ENSG00000258891		1.1338	8.5738e-06		ENSG00000235859		-1.38283	0.0356164
ENSG00000179111	HES7	1.13273	0.000460222		ENSG00000243766	HOTTIP	-1.38195	0.010256
ENSG00000258048	PPP1R12A-AS2	1.13262	3.13772e-07		ENSG00000183161	FANCF	-1.38078	1.50218e-07
ENSG00000214944	ARHGEF28	1.13107	2.73242e-12		ENSG00000268089	GABRQ	-1.38077	1.1799e-14
ENSG00000065600	PACC1	1.13072	1.56764e-07		ENSG00000184678	H2BC21	-1.37899	0.000393363
ENSG00000269680		1.12971	0.0281583		ENSG00000113593	PPWD1	-1.37724	3.7934e-19
ENSG00000181418	DDN	1.12917	0.00544558		ENSG00000188613	NANOS1	-1.37619	0.00664032
ENSG00000120158	RCL1	1.12816	1.13761e-14		ENSG00000279152		-1.37562	2.06628e-05
ENSG00000100311	PDGFB	1.1277	0.000540478		ENSG00000212747	RTL8B	-1.37217	1.53462e-10
ENSG00000272851		1.1267	0.00140419		ENSG00000250920		-1.37129	5.80512e-06
ENSG00000095066	HOOK2	1.1251	1.26053e-25		ENSG00000146197	SCUBE3	-1.36999	0.0479015
ENSG00000159399	HK2	1.12379	3.17991e-31		ENSG00000113361	CDH6	-1.36973	0.000739971
ENSG00000078237	TIGAR	1.12212	0.0315923		ENSG00000132846	ZBED3	-1.36788	6.49344e-17
ENSG00000155438	NIFK	1.12081	5.81913e-16		ENSG00000235194	PPP1R3E	-1.36754	3.71023e-05
ENSG00000138678	GPAT3	1.12016	6.98783e-08		ENSG00000226085	UQCRFS1P1	-1.36658	0.0331124
ENSG00000260107		1.11819	3.88976e-08		ENSG00000260774		-1.36399	0.0156398
ENSG00000116922	C1orf109	1.11799	2.48744e-20		ENSG00000198569	SLC34A3	-1.3632	0.0226451
ENSG00000132481	TRIM47	1.11754	6.11599e-16		ENSG00000134253	TRIM45	-1.36051	7.0029e-11
ENSG00000039560	RAI14	1.11646	1.23774e-24		ENSG00000248109	MARCOL	-1.36017	3.49839e-24
ENSG00000008735	MAPK8IP2	1.11626	0.000446852		ENSG00000213462	ERV3-1	-1.35942	0.0102738
ENSG00000115963	RND3	1.11548	2.59951e-18		ENSG00000277072	STAG3L2	-1.35735	1.36567e-14
ENSG00000148296	SURF6	1.11325	1.67488e-38		ENSG00000203497	PDCD4-AS1	-1.35702	0.000608925
ENSG00000160714	UBE2Q1	1.11251	1.58073e-49		ENSG00000184988	TMEM106A	-1.35501	0.00693458
ENSG00000169288	MRPL1	1.11176	2.52575e-15		ENSG00000060642	PIGV	-1.35377	6.35845e-08
ENSG00000173334	TRIB1	1.10967	9.74381e-10		ENSG00000164118	CEP44	-1.35355	6.98838e-15
ENSG00000184545	DUSP8	1.10957	0.00437642		ENSG00000259146	SIPA1L1-AS1	-1.35298	0.0130536
ENSG00000169228	RAB24	1.1093	3.70412e-08		ENSG00000178567	EPM2AIP1	-1.35194	2.41738e-25
ENSG00000170775	GPR37	1.10902	3.01424e-08		ENSG00000167964	RAB26	-1.35146	1.78755e-05
ENSG00000165732	DDX21	1.10881	1.01969e-28		ENSG00000182463	TSHZ2	-1.3486	1.80851e-15
ENSG00000178409	BEND3	1.10816	2.69723e-09		ENSG00000179941	BBS10	-1.34833	5.91156e-09
ENSG00000196182	STK40	1.10421	1.40355e-12		ENSG00000237491	LINC01409	-1.3464	0.0139356
ENSG00000198538	ZNF28	1.10356	4.47941e-08		ENSG00000134897	BIVM	-1.34587	1.81253e-07
ENSG00000139146	SINHCAF	1.10315	2.42063e-21		ENSG00000279407		-1.34449	6.3649e-09
ENSG00000257548		1.10254	0.0033522		ENSG00000112297	CRYBG1	-1.34379	4.36919e-05
ENSG00000285803		1.10216	0.0296709		ENSG00000197429	IPP	-1.34271	2.55125e-07
ENSG00000198855	FICD	1.10138	1.35791e-05		ENSG00000187790	FANCM	-1.34232	4.20616e-08
ENSG00000080608	PUM3	1.1012	1.78876e-27		ENSG00000126803	HSPA2	-1.34214	1.2308e-05
ENSG00000164086	DUSP7	1.09894	3.98567e-19		ENSG00000269792		-1.3419	0.0222872
ENSG00000077238	IL4R	1.09882	3.03029e-07		ENSG00000068912	ERLEC1	-1.34176	1.73907e-26
ENSG00000147650	LRP12	1.09756	6.75551e-09		ENSG00000163704	PRRT3	-1.34175	0.00449248
ENSG00000100068	LRP5L	1.09719	0.000836298		ENSG00000119812	FAM98A	-1.34131	7.75708e-54
ENSG00000125454	SLC25A19	1.09675	2.62955e-17		ENSG00000142583	SLC2A5	-1.34113	0.00272403
ENSG00000105722	ERF	1.0951	6.26297e-47		ENSG00000111554	MDM1	-1.34094	4.46965e-07
ENSG00000159216	RUNX1	1.09507	2.57124e-14		ENSG00000105204	DYRK1B	-1.34008	3.66559e-10
ENSG00000106546	AHR	1.09332	3.77874e-13		ENSG00000288066		-1.33957	0.0255295
ENSG00000083844	ZNF264	1.0925	1.23366e-08		ENSG00000253719	ATXN7L3B	-1.33948	4.21845e-39
ENSG00000177989	ODF3B	1.09216	0.0469791		ENSG00000172346	CSDC2	-1.33828	2.40362e-12
ENSG00000159753	CARMIL2	1.09103	0.0465395		ENSG00000270012		-1.33825	0.00732626
ENSG00000279172		1.08941	0.00220778		ENSG00000273015		-1.33822	7.4329e-05
ENSG00000105137	SYDE1	1.08713	5.31517e-31		ENSG00000100027	YPEL1	-1.33629	0.0425249
ENSG00000132819	RBM38	1.08621	1.78555e-09		ENSG00000224713		-1.33505	0.00521656
ENSG00000179348	GATA2	1.08524	3.7871e-27		ENSG00000112972	HMGCS1	-1.33331	6.40478e-21
ENSG00000146674	IGFBP3	1.08138	8.26425e-10		ENSG00000177337	DLGAP1-AS1	-1.33279	1.8967e-05
ENSG00000197182	MIRLET7BHG	1.07974	0.000204574		ENSG00000145284	SCD5	-1.32867	4.9639e-08
ENSG00000174640	SLCO2A1	1.07964	2.25125e-06		ENSG00000153714	LURAP1L	-1.32645	6.61208e-06
ENSG00000099250	NRP1	1.07956	2.19775e-12		ENSG00000090971	NAT14	-1.32607	6.96544e-19
ENSG00000076641	PAG1	1.07935	0.000267464		ENSG00000013392	RWDD2A	-1.32582	0.00528599
ENSG00000142910	TINAGL1	1.07906	3.8989e-14		ENSG00000146350	TBC1D32	-1.32536	0.0455125
ENSG00000007516	BAIAP3	1.07843	3.42978e-05		ENSG00000135045	C9orf40	-1.32473	9.34245e-18
ENSG00000146872	TLK2	1.07827	9.80135e-22		ENSG00000164751	PEX2	-1.32367	9.44693e-13
ENSG00000057757	PITHD1	1.07591	1.88594e-38		ENSG00000163683	SMIM14	-1.3225	6.56088e-08
ENSG00000218018	RBM38-AS1	1.07578	0.00770984		ENSG00000070759	TESK2	-1.32121	0.000134427
ENSG00000154380	ENAH	1.07532	1.05671e-41		ENSG00000147118	ZNF182	-1.32008	0.000418775
ENSG00000105810	CDK6	1.07509	3.74079e-11		ENSG00000047188	YTHDC2	-1.31914	2.97709e-23
ENSG00000132604	TERF2	1.07453	3.17011e-13		ENSG00000176422	SPRYD4	-1.31736	3.73651e-09
ENSG00000184182	UBE2F	1.07448	0.00748984		ENSG00000240184	PCDHGC3	-1.31602	0.017496
ENSG00000205763	RP9P	1.07372	0.00858105		ENSG00000229273		-1.31574	0.00652551
ENSG00000205250	E2F4	1.07358	9.52487e-29		ENSG00000269987		-1.31426	1.60917e-08
ENSG00000233825		1.07357	0.00641487		ENSG00000112742	TTK	-1.31327	4.89614e-13
ENSG00000104998	IL27RA	1.07213	0.000437054		ENSG00000226696	LENG8-AS1	-1.31181	1.88811e-05
ENSG00000172375	C2CD2L	1.07114	1.63956e-06		ENSG00000011426	ANLN	-1.31149	1.00636e-54
ENSG00000130529	TRPM4	1.07083	0.018373		ENSG00000272655	POLR2J4	-1.31142	4.20398e-05
ENSG00000143398	PIP5K1A	1.07081	5.63616e-39		ENSG00000131269	ABCB7	-1.31141	1.19077e-20
ENSG00000180035	ZNF48	1.06978	1.42917e-08		ENSG00000174353	STAG3L3	-1.31132	8.48099e-13
ENSG00000119922	IFIT2	1.06805	7.66351e-11		ENSG00000214135		-1.30862	8.01654e-12
ENSG00000232803	SLCO4A1-AS1	1.06769	4.6354e-06		ENSG00000250635	CXXC5-AS1	-1.30717	0.000795541
ENSG00000162650	ATXN7L2	1.06735	1.57812e-11		ENSG00000204054	LINC00963	-1.30646	1.04634e-15
ENSG00000164626	KCNK5	1.06678	7.39049e-07		ENSG00000138735	PDE5A	-1.30608	1.39444e-06
ENSG00000101255	TRIB3	1.06642	3.07163e-09		ENSG00000233222		-1.30499	0.000372836
ENSG00000101665	SMAD7	1.06571	6.21975e-18		ENSG00000250602		-1.30376	0.00675322
ENSG00000170485	NPAS2	1.06456	4.51364e-12		ENSG00000105514	RAB3D	-1.30366	0.0003588
ENSG00000234127	TRIM26	1.06422	6.00503e-30		ENSG00000185133	INPP5J	-1.30224	0.0136676
ENSG00000186162	CIDECP1	1.06391	0.00450854		ENSG00000171448	ZBTB26	-1.3017	1.38184e-07
ENSG00000127947	PTPN12	1.06359	4.94734e-17		ENSG00000179933	C14orf119	-1.30131	4.34294e-20
ENSG00000100558	PLEK2	1.06316	6.13749e-12		ENSG00000111540	RAB5B	-1.29605	1.06151e-43
ENSG00000133121	STARD13	1.06311	2.47768e-08		ENSG00000135845	PIGC	-1.29483	3.44925e-13
ENSG00000132170	PPARG	1.06147	9.06623e-06		ENSG00000247240	UBL7-DT	-1.29362	0.019264
ENSG00000266171		1.06058	0.00384598		ENSG00000181035	SLC25A42	-1.29353	0.0119325
ENSG00000229257		1.05926	0.00425162		ENSG00000104549	SQLE	-1.29343	1.46939e-25
ENSG00000172667	ZMAT3	1.05922	2.23548e-08		ENSG00000248019	FAM13A-AS1	-1.29342	0.000571077
ENSG00000198947	DMD	1.0588	1.04781e-11		ENSG00000164930	FZD6	-1.29315	6.41453e-19
ENSG00000204859	ZBTB48	1.05867	1.17997e-10		ENSG00000184227	ACOT1	-1.29237	0.0334862
ENSG00000106617	PRKAG2	1.05682	7.4757e-05		ENSG00000083814	ZNF671	-1.29138	0.00838986
ENSG00000153904	DDAH1	1.05587	1.08143e-17		ENSG00000104140	RHOV	-1.28917	0.00208263
ENSG00000089234	BRAP	1.0556	7.22045e-15		ENSG00000155876	RRAGA	-1.28878	1.56294e-27
ENSG00000163811	WDR43	1.05508	1.66854e-25		ENSG00000146530	VWDE	-1.28675	0.0125092
ENSG00000079335	CDC14A	1.05506	0.00102471		ENSG00000274070	CASTOR2	-1.28652	1.80049e-07
ENSG00000226605		1.0539	0.019934		ENSG00000124635	H2BC11	-1.28585	0.00209849
ENSG00000250056	LINC01018	1.05323	1.68155e-25		ENSG00000185585	OLFML2A	-1.28544	8.67501e-36
ENSG00000133816	MICAL2	1.0518	1.48045e-10		ENSG00000231794		-1.28479	0.00176341
ENSG00000168283	BMI1	1.0514	8.44536e-10		ENSG00000268362		-1.28346	2.49745e-06
ENSG00000037474	NSUN2	1.04944	6.48922e-98		ENSG00000172869	DMXL1	-1.28237	2.38814e-21
ENSG00000160360	GPSM1	1.04921	2.07231e-19		ENSG00000196456	ZNF775	-1.28231	0.0437495
ENSG00000180801	ARSJ	1.0478	2.74809e-06		ENSG00000095002	MSH2	-1.2815	2.08433e-28
ENSG00000158050	DUSP2	1.04764	7.56489e-06		ENSG00000125703	ATG4C	-1.28041	1.36871e-07
ENSG00000197905	TEAD4	1.04617	1.57961e-20		ENSG00000053918	KCNQ1	-1.28037	0.000236708
ENSG00000232085		1.04537	0.0210747		ENSG00000171798	KNDC1	-1.28021	0.000146214
ENSG00000146457	WTAP	1.04512	2.32805e-23		ENSG00000286078		-1.27983	3.69267e-06
ENSG00000197044	ZNF441	1.04456	0.00186243		ENSG00000267002		-1.2791	6.16143e-08
ENSG00000255507	UVRAG-DT	1.04455	0.00303096		ENSG00000182796	TMEM198B	-1.27557	0.000234982
ENSG00000198223	CSF2RA	1.04398	0.00159316		ENSG00000225264	ZNRF2P2	-1.27536	0.0414053
ENSG00000255248	MIR100HG	1.0439	0.0096303		ENSG00000168303	MPLKIP	-1.27523	3.10208e-14
ENSG00000197019	SERTAD1	1.04365	8.80179e-09		ENSG00000282851	BISPR	-1.27506	0.00216
ENSG00000198780	FAM169A	1.04272	0.00115315		ENSG00000151611	MMAA	-1.27267	0.0109134
ENSG00000134686	PHC2	1.04226	2.62731e-21		ENSG00000189050	RNFT1	-1.26992	2.35465e-05
ENSG00000104859	CLASRP	1.04196	3.21129e-14		ENSG00000134590	RTL8C	-1.26964	4.59054e-25
ENSG00000179630	LACC1	1.04157	0.00664048		ENSG00000259865		-1.2688	0.0312045
ENSG00000188522	FAM83G	1.04017	3.24026e-39		ENSG00000134376	CRB1	-1.26649	0.000256972
ENSG00000177410	ZFAS1	1.03969	3.42203e-06		ENSG00000135517	MIP	-1.26473	0.031368
ENSG00000165689	ENTR1	1.03636	7.85293e-48		ENSG00000153291	SLC25A27	-1.26288	0.00276976
ENSG00000188283	ZNF383	1.03543	0.000994966		ENSG00000221955	SLC12A8	-1.2625	1.99763e-08
ENSG00000160741	CRTC2	1.03494	7.7094e-25		ENSG00000119899	SLC17A5	-1.26149	2.87519e-08
ENSG00000006327	TNFRSF12A	1.03267	1.61675e-29		ENSG00000261054		-1.26068	1.3068e-36
ENSG00000254680		1.03247	0.00549033		ENSG00000271774		-1.26047	0.0232469
ENSG00000230140	NPAS2-AS1	1.03207	0.000419773		ENSG00000141052	MYOCD	-1.25922	7.18619e-23
ENSG00000230453	ANKRD18B	1.02917	2.86244e-08		ENSG00000196517	SLC6A9	-1.25899	1.63214e-05
ENSG00000155846	PPARGC1B	1.02698	1.2444e-09		ENSG00000171155	C1GALT1C1	-1.25835	3.54242e-09
ENSG00000272356		1.02666	0.0212274		ENSG00000189241	TSPYL1	-1.25793	2.41346e-40
ENSG00000265008		1.02628	0.0467664		ENSG00000283341		-1.25743	0.0188855
ENSG00000179598	PLD6	1.02624	1.5579e-05		ENSG00000167106	FAM102A	-1.25737	6.92809e-33
ENSG00000198742	SMURF1	1.02622	2.42193e-21		ENSG00000212978		-1.25726	1.08173e-06
ENSG00000185950	IRS2	1.02543	1.07092e-47		ENSG00000066230	SLC9A3	-1.25683	6.28941e-08
ENSG00000149716	LTO1	1.02527	8.70938e-26		ENSG00000248008	NRAV	-1.25572	7.90818e-14
ENSG00000256053	COA8	1.02499	4.17846e-06		ENSG00000106031	HOXA13	-1.25531	2.83302e-11
ENSG00000287387		1.02491	0.00314703		ENSG00000019186	CYP24A1	-1.25458	0.000123918
ENSG00000144645	OSBPL10	1.02461	5.9438e-35		ENSG00000111850	SMIM8	-1.25452	0.000642374
ENSG00000148291	SURF2	1.02372	5.62543e-18		ENSG00000268388	FENDRR	-1.25353	3.51413e-09
ENSG00000176407	KCMF1	1.02192	4.42827e-37		ENSG00000116793	PHTF1	-1.2531	1.81782e-17
ENSG00000146648	EGFR	1.02064	2.27556e-28		ENSG00000243232	PCDHAC2	-1.25268	1.93205e-05
ENSG00000238258		1.01978	0.000268445		ENSG00000173480	ZNF417	-1.2507	5.7245e-05
ENSG00000150457	LATS2	1.0193	4.84111e-16		ENSG00000276863		-1.25053	0.000712572
ENSG00000241313	WWTR1-AS1	1.0189	4.98273e-06		ENSG00000139793	MBNL2	-1.24929	1.04278e-14
ENSG00000130396	AFDN	1.01792	5.08263e-09		ENSG00000286450		-1.2492	0.00499679
ENSG00000130826	DKC1	1.01762	3.38158e-55		ENSG00000176681	LRRC37A	-1.24912	0.0464193
ENSG00000165105	RASEF	1.01729	7.50223e-07		ENSG00000142686	C1orf216	-1.24836	1.03937e-18
ENSG00000112096	SOD2	1.01647	5.82693e-19		ENSG00000214194	SMIM30	-1.24566	4.39067e-15
ENSG00000121481	RNF2	1.01599	1.18664e-05		ENSG00000078804	TP53INP2	-1.24559	6.73064e-06
ENSG00000103126	AXIN1	1.01596	2.39954e-30		ENSG00000240771	ARHGEF25	-1.24529	0.0261411
ENSG00000015133	CCDC88C	1.0151	4.52335e-16		ENSG00000281344	HELLPAR	-1.24307	0.00177852
ENSG00000176597	B3GNT5	1.01361	0.000555425		ENSG00000228824	MIR4500HG	-1.24285	0.0449401
ENSG00000163389	POGLUT1	1.01192	4.62801e-10		ENSG00000176087	SLC35A4	-1.24267	4.2603e-66
ENSG00000127507	ADGRE2	1.01146	2.05913e-06		ENSG00000286367		-1.24195	0.0145955
ENSG00000156639	ZFAND3	1.01146	9.65085e-21		ENSG00000070371	CLTCL1	-1.24087	4.82984e-16
ENSG00000117036	ETV3	1.01129	3.9171e-14		ENSG00000231764	DLX6-AS1	-1.23961	0.0158893
ENSG00000073921	PICALM	1.0109	2.94138e-25		ENSG00000164292	RHOBTB3	-1.23798	1.36749e-34
ENSG00000168884	TNIP2	1.01023	8.07847e-19		ENSG00000223546	LINC00630	-1.2376	0.00556691
ENSG00000107554	DNMBP	1.00938	4.19355e-25		ENSG00000126217	MCF2L	-1.23728	6.15199e-18
ENSG00000177426	TGIF1	1.0087	4.51955e-23		ENSG00000272668		-1.23723	7.77018e-05
ENSG00000143322	ABL2	1.00726	2.67748e-29		ENSG00000133704	IPO8	-1.23714	2.61226e-27
ENSG00000176749	CDK5R1	1.00709	0.013132		ENSG00000225850		-1.23605	0.0499862
ENSG00000101187	SLCO4A1	1.006	1.11835e-05		ENSG00000166823	MESP1	-1.2357	0.0276333
ENSG00000283154	IQCJ-SCHIP1	1.00541	1.45437e-10		ENSG00000160325	CACFD1	-1.23399	1.56149e-07
ENSG00000135083	CCNJL	1.00529	3.37213e-05		ENSG00000186104	CYP2R1	-1.23357	4.15709e-05
ENSG00000185650	ZFP36L1	1.00459	2.06605e-21		ENSG00000197296	FITM2	-1.23186	4.89024e-11
ENSG00000148925	BTBD10	1.0042	2.92429e-08		ENSG00000161558	TMEM143	-1.22781	5.62341e-06
ENSG00000263843	MIF4GD-DT	1.00233	1.94774e-05		ENSG00000212694	LINC01089	-1.22505	0.0172225
ENSG00000105327	BBC3	1.00209	0.000197472		ENSG00000154274	C4orf19	-1.22504	0.0135225
ENSG00000115648	MLPH	1.00034	0.0338697		ENSG00000105011	ASF1B	-1.22088	1.29553e-36
					ENSG00000261578		-1.22054	0.000260052
					ENSG00000165572	KBTBD6	-1.21962	1.67692e-15
					ENSG00000105875	WDR91	-1.21961	1.52882e-12
					ENSG00000173852	DPY19L1	-1.21838	1.54456e-26
					ENSG00000141933	TPGS1	-1.21782	3.22681e-09
					ENSG00000267530	LINC01836	-1.21717	2.80837e-09
					ENSG00000116668	SWT1	-1.21694	0.0334862
					ENSG00000183260	ABHD16B	-1.21675	5.30084e-06
					ENSG00000163517	HDAC11	-1.21658	0.0194339
					ENSG00000279344		-1.21585	0.000141313
					ENSG00000266173	STRADA	-1.21535	0.0340522
					ENSG00000096093	EFHC1	-1.21447	1.28869e-10
					ENSG00000280435		-1.21319	0.000418943
					ENSG00000101639	CEP192	-1.21243	1.09342e-16
					ENSG00000262454	MIR193BHG	-1.21016	7.28159e-09
					ENSG00000280187		-1.20968	0.00439144
					ENSG00000242622		-1.20663	0.0281583
					ENSG00000247271	ZBED5-AS1	-1.20643	0.0218822
					ENSG00000115507	OTX1	-1.20614	0.00971638
					ENSG00000203950	RTL8A	-1.20593	1.13805e-14
					ENSG00000171121	KCNMB3	-1.20467	0.0384722
					ENSG00000159433	STARD9	-1.20364	2.21886e-06
					ENSG00000225138	SLC9A3-AS1	-1.20353	1.29675e-15
					ENSG00000225377	NRSN2-AS1	-1.2026	0.0155787
					ENSG00000196455	PIK3R4	-1.2024	7.59642e-16
					ENSG00000205808	PLPP6	-1.20203	1.17387e-05
					ENSG00000182108	DEXI	-1.19917	5.67133e-15
					ENSG00000100479	POLE2	-1.19907	7.95095e-06
					ENSG00000135643	KCNMB4	-1.19901	0.000359363
					ENSG00000257386		-1.19749	2.77223e-09
					ENSG00000189298	ZKSCAN3	-1.19672	0.00700495
					ENSG00000187713	TMEM203	-1.19198	7.17927e-20
					ENSG00000285410	GABPB1-IT1	-1.19134	0.00010648
					ENSG00000100968	NFATC4	-1.19127	2.55058e-11
					ENSG00000257556	LINC02298	-1.19085	0.0362659
					ENSG00000124641	MED20	-1.18911	5.17477e-05
					ENSG00000185567	AHNAK2	-1.18784	1.4193e-59
					ENSG00000198105	ZNF248	-1.18782	3.82467e-06
					ENSG00000245532	NEAT1	-1.1871	1.94952e-14
					ENSG00000143952	VPS54	-1.1852	1.12131e-05
					ENSG00000150593	PDCD4	-1.18415	8.33315e-36
					ENSG00000183891	TTC32	-1.18287	0.000271817
					ENSG00000103852	TTC23	-1.18224	9.12608e-07
					ENSG00000146243	IRAK1BP1	-1.18134	0.00011122
					ENSG00000175322	ZNF519	-1.18015	0.000582968
					ENSG00000198642	KLHL9	-1.18007	4.34629e-29
					ENSG00000110002	VWA5A	-1.17969	0.00058108
					ENSG00000224078	SNHG14	-1.17953	1.68789e-26
					ENSG00000088179	PTPN4	-1.17899	8.20011e-07
					ENSG00000161888	SPC24	-1.17842	9.90337e-21
					ENSG00000177427	MIEF2	-1.17741	1.04457e-05
					ENSG00000166396	SERPINB7	-1.17531	0.0413228
					ENSG00000182253	SYNM	-1.17416	7.45805e-48
					ENSG00000181904	C5orf24	-1.17387	3.36635e-20
					ENSG00000176903	PNMA1	-1.17383	1.79948e-42
					ENSG00000230844	ZNF674-AS1	-1.17371	0.00148783
					ENSG00000278709	NKILA	-1.17345	0.000116781
					ENSG00000084731	KIF3C	-1.17323	1.3273e-09
					ENSG00000133739	LRRCC1	-1.17179	4.99467e-05
					ENSG00000164683	HEY1	-1.17157	0.000181457
					ENSG00000267270	PARD6G-AS1	-1.17021	0.00391769
					ENSG00000185361	TNFAIP8L1	-1.16986	0.000184852
					ENSG00000179583	CIITA	-1.16955	2.07584e-07
					ENSG00000261604		-1.1687	8.20754e-06
					ENSG00000172915	NBEA	-1.1675	1.58962e-06
					ENSG00000164542	KIAA0895	-1.1675	5.83928e-25
					ENSG00000205923	CEMP1	-1.16727	5.74351e-05
					ENSG00000284946		-1.16692	0.00016399
					ENSG00000255302	EID1	-1.1646	5.27725e-56
					ENSG00000180425	C11orf71	-1.16438	0.0119372
					ENSG00000100883	SRP54	-1.16429	1.01031e-30
					ENSG00000079308	TNS1	-1.16426	1.07003e-10
					ENSG00000137507	LRRC32	-1.16373	0.000367574
					ENSG00000186603	HPDL	-1.16302	2.63154e-12
					ENSG00000179818	PCBP1-AS1	-1.16292	9.38751e-55
					ENSG00000127980	PEX1	-1.16253	4.39681e-13
					ENSG00000177383	MAGEF1	-1.16206	3.18732e-09
					ENSG00000169105	CHST14	-1.1619	1.14522e-08
					ENSG00000243701	DUBR	-1.16053	0.000443993
					ENSG00000197191	CYSRT1	-1.16041	1.87698e-05
					ENSG00000221886	ZBED8	-1.1603	0.0138798
					ENSG00000173221	GLRX	-1.1603	1.42611e-06
					ENSG00000271643	PDCD6IP-DT	-1.15829	0.00200879
					ENSG00000133710	SPINK5	-1.15819	0.00415601
					ENSG00000135976	ANKRD36	-1.15771	3.09263e-05
					ENSG00000020922	MRE11	-1.15714	2.20634e-16
					ENSG00000187609	EXD3	-1.1547	2.73374e-06
					ENSG00000156381	ANKRD9	-1.15464	1.20584e-10
					ENSG00000129757	CDKN1C	-1.15456	1.93521e-25
					ENSG00000102287	GABRE	-1.15403	6.64829e-07
					ENSG00000117266	CDK18	-1.1539	5.31971e-09
					ENSG00000082269	FAM135A	-1.15232	2.61755e-05
					ENSG00000197603	CPLANE1	-1.15172	3.39725e-25
					ENSG00000143315	PIGM	-1.15068	9.19622e-13
					ENSG00000173928	SWSAP1	-1.14991	0.018367
					ENSG00000164089	ETNPPL	-1.14941	0.0449502
					ENSG00000177732	SOX12	-1.14892	2.43493e-14
					ENSG00000142784	WDTC1	-1.14836	4.27508e-17
					ENSG00000215883	CYB5RL	-1.14827	1.40567e-07
					ENSG00000138764	CCNG2	-1.14616	6.59546e-10
					ENSG00000250571	GLI4	-1.14503	0.000895199
					ENSG00000066279	ASPM	-1.14332	4.6444e-12
					ENSG00000075089	ACTR6	-1.14311	2.23393e-07
					ENSG00000180185	FAHD1	-1.1422	2.50668e-16
					ENSG00000160058	BSDC1	-1.142	9.59469e-24
					ENSG00000196787	H2AC11	-1.14059	0.00556691
					ENSG00000186908	ZDHHC17	-1.13989	3.69853e-10
					ENSG00000268858		-1.13985	7.09082e-10
					ENSG00000189339	SLC35E2B	-1.13946	1.42887e-24
					ENSG00000140451	PIF1	-1.13901	6.49882e-05
					ENSG00000141542	RAB40B	-1.13864	0.000492679
					ENSG00000198743	SLC5A3	-1.13858	9.99606e-07
					ENSG00000111325	OGFOD2	-1.13726	0.0246289
					ENSG00000164048	ZNF589	-1.13722	7.26034e-06
					ENSG00000112874	NUDT12	-1.13716	1.52862e-07
					ENSG00000171451	DSEL	-1.13684	1.33467e-08
					ENSG00000135069	PSAT1	-1.13298	5.09699e-08
					ENSG00000135333	EPHA7	-1.13214	0.000741798
					ENSG00000072571	HMMR	-1.13196	3.11776e-18
					ENSG00000135245	HILPDA	-1.13125	6.91225e-06
					ENSG00000213713	PIGCP1	-1.13058	7.623e-05
					ENSG00000108469	RECQL5	-1.12762	4.22253e-10
					ENSG00000083642	PDS5B	-1.12655	2.01641e-16
					ENSG00000177854	TMEM187	-1.12568	0.00686323
					ENSG00000277443	MARCKS	-1.12545	8.61171e-36
					ENSG00000258056	CD63-AS1	-1.12529	4.45565e-05
					ENSG00000175793	SFN	-1.12503	8.17148e-62
					ENSG00000040608	RTN4R	-1.12293	0.000709482
					ENSG00000149311	ATM	-1.12257	5.32484e-11
					ENSG00000264575	LINC00526	-1.12237	0.0289098
					ENSG00000242265	PEG10	-1.12235	1.4572e-42
					ENSG00000257829		-1.122	0.0452349
					ENSG00000177045	SIX5	-1.12183	4.06875e-11
					ENSG00000259605		-1.12131	1.31294e-09
					ENSG00000135338	LCA5	-1.12075	0.0207701
					ENSG00000214174	AMZ2P1	-1.11904	0.00772673
					ENSG00000171109	MFN1	-1.11899	1.0087e-16
					ENSG00000006025	OSBPL7	-1.11869	8.05604e-08
					ENSG00000224152		-1.11651	0.0136719
					ENSG00000232593	KANTR	-1.11644	0.000165908
					ENSG00000135315	CEP162	-1.11622	1.46253e-06
					ENSG00000117620	SLC35A3	-1.11565	1.28402e-08
					ENSG00000166352	IFTAP	-1.11526	0.00240487
					ENSG00000256537	SMIM10L1	-1.11519	9.26649e-18
					ENSG00000165434	PGM2L1	-1.11398	5.21023e-09
					ENSG00000169564	PCBP1	-1.11379	1.10819e-50
					ENSG00000263424		-1.11333	2.74777e-10
					ENSG00000183340	JRKL	-1.10965	1.89177e-07
					ENSG00000105856	HBP1	-1.1081	2.8322e-10
					ENSG00000255737	AGAP2-AS1	-1.10729	0.000116632
					ENSG00000164761	TNFRSF11B	-1.10691	0.0053538
					ENSG00000164694	FNDC1	-1.10588	0.00218261
					ENSG00000172493	AFF1	-1.10531	2.05279e-20
					ENSG00000223478		-1.10504	0.0214485
					ENSG00000185829	ARL17A	-1.10478	0.00472762
					ENSG00000137094	DNAJB5	-1.10446	2.72677e-05
					ENSG00000249042	FAM151B-DT	-1.10391	2.1219e-05
					ENSG00000181315	ZNF322	-1.1038	2.38607e-05
					ENSG00000139998	RAB15	-1.10376	0.0222737
					ENSG00000179918	SEPHS2	-1.10314	9.5256e-26
					ENSG00000103034	NDRG4	-1.10268	0.00813076
					ENSG00000115282	TTC31	-1.10195	3.78181e-09
					ENSG00000116701	NCF2	-1.10114	0.00183134
					ENSG00000109971	HSPA8	-1.10089	1.73235e-163
					ENSG00000100802	C14orf93	-1.10085	0.000697914
					ENSG00000166402	TUB	-1.09934	1.05097e-23
					ENSG00000160094	ZNF362	-1.09885	3.04461e-08
					ENSG00000139132	FGD4	-1.09858	0.000395361
					ENSG00000237298	TTN-AS1	-1.09854	0.00545149
					ENSG00000061455	PRDM6	-1.0983	0.0427213
					ENSG00000115687	PASK	-1.09632	7.34108e-12
					ENSG00000188707	ZBED6CL	-1.09519	5.65342e-12
					ENSG00000183665	TRMT12	-1.0949	3.32408e-08
					ENSG00000109501	WFS1	-1.09489	1.73527e-12
					ENSG00000286340		-1.09444	0.00787169
					ENSG00000204439	C6orf47	-1.09294	3.23516e-08
					ENSG00000235079	ZRANB2-AS1	-1.09261	2.64117e-06
					ENSG00000133302	SLF1	-1.09247	2.71318e-20
					ENSG00000074370	ATP2A3	-1.09242	9.71703e-09
					ENSG00000164241	C5orf63	-1.09202	0.00765167
					ENSG00000181690	PLAG1	-1.09053	0.0112114
					ENSG00000148541	FAM13C	-1.0901	0.00974168
					ENSG00000167552	TUBA1A	-1.08907	3.33048e-13
					ENSG00000171658	NMRAL2P	-1.08703	0.00342126
					ENSG00000117318	ID3	-1.08694	6.40702e-29
					ENSG00000204682	MIR1915HG	-1.08605	1.13609e-07
					ENSG00000100889	PCK2	-1.0838	0.000642118
					ENSG00000139133	ALG10	-1.08377	1.69349e-05
					ENSG00000172403	SYNPO2	-1.08347	0.0109574
					ENSG00000111801	BTN3A3	-1.08321	0.0101032
					ENSG00000160703	NLRX1	-1.08283	1.9772e-05
					ENSG00000102048	ASB9	-1.08265	0.00267847
					ENSG00000142303	ADAMTS10	-1.08048	7.18618e-07
					ENSG00000267321	SNHG30	-1.08013	0.00264112
					ENSG00000196312	MFSD14C	-1.07894	9.62603e-14
					ENSG00000186684	CYP27C1	-1.07828	0.00303833
					ENSG00000146733	PSPH	-1.07807	9.47828e-16
					ENSG00000250565	ATP6V1E2	-1.07702	0.0200333
					ENSG00000144445	KANSL1L	-1.07495	7.72901e-07
					ENSG00000168300	PCMTD1	-1.07434	4.25346e-06
					ENSG00000186767	SPIN4	-1.07357	3.75522e-05
					ENSG00000233369	GTF2IP4	-1.07273	0.000205072
					ENSG00000177406	NINJ2-AS1	-1.07242	2.54685e-05
					ENSG00000167333	TRIM68	-1.07205	0.000314666
					ENSG00000162600	OMA1	-1.07041	0.00381173
					ENSG00000108405	P2RX1	-1.06957	0.000382723
					ENSG00000152749	GPR180	-1.06936	3.51307e-10
					ENSG00000144040	SFXN5	-1.06927	1.97476e-05
					ENSG00000163491	NEK10	-1.06603	0.0203652
					ENSG00000130312	MRPL34	-1.06548	4.67295e-16
					ENSG00000156509	FBXO43	-1.06531	0.000758222
					ENSG00000136828	RALGPS1	-1.06503	0.0100814
					ENSG00000274925	ZKSCAN2-DT	-1.06484	0.00406636
					ENSG00000094841	UPRT	-1.06385	4.14028e-05
					ENSG00000103479	RBL2	-1.0637	5.11407e-13
					ENSG00000152944	MED21	-1.0631	1.13146e-15
					ENSG00000196670	ZFP62	-1.06286	3.08466e-13
					ENSG00000132286	TIMM10B	-1.06248	2.03654e-07
					ENSG00000186480	INSIG1	-1.0611	2.24996e-24
					ENSG00000215386	MIR99AHG	-1.06059	0.0001005
					ENSG00000152580	IGSF10	-1.06025	1.4528e-17
					ENSG00000076555	ACACB	-1.05926	5.38036e-07
					ENSG00000162496	DHRS3	-1.0585	1.12142e-06
					ENSG00000104983	CCDC61	-1.05812	1.60575e-05
					ENSG00000259668		-1.05679	0.034628
					ENSG00000164039	BDH2	-1.05599	0.00105006
					ENSG00000164970	FAM219A	-1.05532	2.03447e-10
					ENSG00000070540	WIPI1	-1.05439	0.000193338
					ENSG00000245694	CRNDE	-1.05329	5.10606e-09
					ENSG00000182195	LDOC1	-1.05321	2.6384e-11
					ENSG00000177225	GATD1	-1.05317	1.14177e-11
					ENSG00000122970	IFT81	-1.0518	1.36415e-10
					ENSG00000272086	GOLPH3-DT	-1.05144	0.0420039
					ENSG00000198948	MFAP3L	-1.05124	4.47124e-05
					ENSG00000068885	IFT80	-1.05107	1.01344e-10
					ENSG00000265254		-1.05104	0.0398737
					ENSG00000232931	LINC00342	-1.05095	0.000205671
					ENSG00000268001	CARD8-AS1	-1.05023	0.0116276
					ENSG00000177432	NAP1L5	-1.04942	3.13394e-06
					ENSG00000054654	SYNE2	-1.04907	3.34629e-19
					ENSG00000170270	GON7	-1.04884	4.42457e-05
					ENSG00000196981	WDR5B	-1.04832	0.00174429
					ENSG00000154485	MMP21	-1.04744	0.0228588
					ENSG00000213626	LBH	-1.04592	5.10911e-14
					ENSG00000228594	FNDC10	-1.04511	1.26773e-07
					ENSG00000183718	TRIM52	-1.04473	2.56688e-11
					ENSG00000186862	PDZD7	-1.04459	0.0216953
					ENSG00000133069	TMCC2	-1.04445	0.000760785
					ENSG00000072840	EVC	-1.04442	1.59976e-08
					ENSG00000111432	FZD10	-1.04312	1.4511e-05
					ENSG00000088888	MAVS	-1.03854	1.43349e-26
					ENSG00000012048	BRCA1	-1.03805	1.59299e-21
					ENSG00000110455	ACCS	-1.03758	0.027547
					ENSG00000132485	ZRANB2	-1.03368	2.01641e-16
					ENSG00000278921	EPB41L4A-DT	-1.03328	0.0158255
					ENSG00000223799	IL10RB-DT	-1.033	0.0177028
					ENSG00000116711	PLA2G4A	-1.03291	5.12234e-13
					ENSG00000276131		-1.03097	0.00169834
					ENSG00000187866	PABIR1	-1.02866	5.78738e-06
					ENSG00000088970	KIZ	-1.0284	1.93563e-06
					ENSG00000017427	IGF1	-1.02781	0.0135619
					ENSG00000073584	SMARCE1	-1.02754	0.0281656
					ENSG00000114378	HYAL1	-1.02531	0.000767392
					ENSG00000103381	CPPED1	-1.02529	2.35739e-07
					ENSG00000104154	SLC30A4	-1.02461	0.0131571
					ENSG00000120647	CCDC77	-1.02428	9.76846e-08
					ENSG00000120093	HOXB3	-1.02417	0.0339159
					ENSG00000115339	GALNT3	-1.02227	1.8996e-06
					ENSG00000287335		-1.02165	0.00758893
					ENSG00000171222	SCAND1	-1.02138	3.29832e-10
					ENSG00000133466	C1QTNF6	-1.02127	0.0237136
					ENSG00000169126	ODAD2	-1.02124	0.00592542
					ENSG00000000460	C1orf112	-1.02093	4.73997e-10
					ENSG00000251187		-1.02046	0.00167426
					ENSG00000251474	RPL32P3	-1.02017	2.44293e-07
					ENSG00000136897	MRPL50	-1.01977	6.1468e-12
					ENSG00000196502	SULT1A1	-1.01969	0.00526674
					ENSG00000177706	FAM20C	-1.01962	2.02957e-06
					ENSG00000115266	APC2	-1.01956	0.000107884
					ENSG00000225733	FGD5-AS1	-1.01937	4.27733e-26
					ENSG00000163026	WDCP	-1.01895	2.57923e-06
					ENSG00000256060	TRAPPC2B	-1.01832	0.0320204
					ENSG00000180318	ALX1	-1.01825	0.0207391
					ENSG00000198556	ZNF789	-1.01768	4.92328e-08
					ENSG00000286388		-1.0173	4.15249e-05
					ENSG00000161692	DBF4B	-1.01721	1.49866e-15
					ENSG00000132692	BCAN	-1.01657	0.0192275
					ENSG00000148730	EIF4EBP2	-1.01618	1.1088e-18
					ENSG00000259589		-1.01577	0.000432589
					ENSG00000233077	LINC01271	-1.01511	0.0477411
					ENSG00000133678	TMEM254	-1.01467	0.0130918
					ENSG00000272106		-1.01368	0.0213201
					ENSG00000154957	ZNF18	-1.01305	0.0255338
					ENSG00000189180	ZNF33A	-1.01218	2.23792e-08
					ENSG00000174501	ANKRD36C	-1.01188	0.0197551
					ENSG00000226752	CUTALP	-1.01185	6.04882e-10
					ENSG00000257702	LBX2-AS1	-1.01096	0.0279283
					ENSG00000111271	ACAD10	-1.01051	0.00170184
					ENSG00000233101	HOXB-AS3	-1.01019	6.32931e-05
					ENSG00000187144	SPATA21	-1.00952	1.83604e-21
					ENSG00000178252	WDR6	-1.00935	3.55293e-43
					ENSG00000072422	RHOBTB1	-1.00868	2.54733e-11
					ENSG00000272841	MAP3K4-AS1	-1.00773	0.00474061
					ENSG00000149218	ENDOD1	-1.00766	2.85768e-06
					ENSG00000256223	ZNF10	-1.00757	0.00981231
					ENSG00000198246	SLC29A3	-1.0074	0.0331445
					ENSG00000166619	BLCAP	-1.00646	2.95256e-25
					ENSG00000254578		-1.00597	0.0326919
					ENSG00000164070	HSPA4L	-1.00579	1.10931e-16
					ENSG00000215068		-1.00578	2.17895e-06
					ENSG00000248905	FMN1	-1.00567	0.000692807
					ENSG00000253710	ALG11	-1.00548	2.28806e-05
					ENSG00000020181	ADGRA2	-1.00541	4.28275e-10
					ENSG00000169247	SH3TC2	-1.00519	0.00196907
					ENSG00000108176	DNAJC12	-1.00455	0.000357859
					ENSG00000173402	DAG1	-1.00355	5.66601e-24
					ENSG00000116017	ARID3A	-1.00327	1.15334e-09
					ENSG00000138640	FAM13A	-1.00281	6.70326e-07
					ENSG00000160199	PKNOX1	-1.00253	7.36711e-09
					ENSG00000260892		-1.00226	0.0257233
					ENSG00000106003	LFNG	-1.00216	1.05916e-06
					ENSG00000267080	ASB16-AS1	-1.00141	0.00860473
					ENSG00000140993	TIGD7	-1.00105	0.0471049
					ENSG00000162913	OBSCN-AS1	-1.00058	0.00553843
					ENSG00000132793	LPIN3	-1.00027	0.00242874
					ENSG00000100324	TAB1	-1.00025	9.45658e-15
